# Supplementary material for: Estrogen receptor alpha in the brain mediates tamoxifen-induced changes in physiology in mice
Source: eLife. 2021 Mar 1;10:e63333. doi: 10.7554/eLife.63333 (PMC7924955; doi:10.7554/eLife.63333)
Supplement: Figure 1—figure supplement 1—source data 1. — Hourly average of tail skin temperature (Ttail) over 3 days before and 3 weeks after injections measured every 5 min using attached thermal logger. Each column is an independent mouse. [file elife-63333-fig1-figsupp1-data1.xlsx]

## Sheet: Sheet1
Source data for Figure 1 - Figure Supplement 1, panel a. Hourly average of tail skin temperature (Ttail) over 3 days before and 3 weeks after injections measured every 5 min using attached thermal logger. Each column is an independent mouse.
time,h	Oil							Tmx
7	31.27	28.76	25.36	31	24.2	31.68	26.5	29.25	28.47	31.34	31.35	27.74	25	23.49	25.82
8	29.87	26.61	34.56	32.57	28.18	31.9	23.11	28.8	33.17	31.34	32.08	32.55	27.3	31.83	23.76
9	27.22	31.01	33.39	28.17	25.04	30.52	26.81	27.41	32.96	28.34	33.42	31.71	31.6	31.32	32.19
10	29.53	30.83	32.14	27.75	33.69	28.1	28.88	26.1	34.73	31.06	33.64	27.75	33.69	28.1	28.88
11	31.22	33.53	34.3	29.5	24.77	31.71	25.14	32.85	34.33	32.32	33.24	29.5	24.77	31.71	25.14
12	29.59	33.23	33.83	30.75	28.07	32.38	32.53	31.22	29.1	30.54	33.07	30.75	28.07	32.38	32.53
13	31.89	31.57	31.21	30.15	29.68	29.41	32.27	31.65	33.09	32.47	30.76	30.15	29.68	29.41	32.27
14	31	32.55	30.79	29.37	27.97	30.4	28.43	31.9	33.69	28.75	28.85	29.37	27.97	30.4	28.43
15	27.68	32.12	32.26	29.07	33	30.56	30.77	33.09	32.61	31.84	31.07	29.07	33	30.56	30.77
16	29.43	29.84	27.66	26.62	27.52	28.24	27.76	32.11	32.4	29.81	29.94	26.62	27.52	28.24	27.76
17	29.02	28.53	33.12	27.48	27.97	29.3	33.72	32.32	31.75	28.83	30.05	27.48	27.97	29.3	33.72
18	28.16	32.77	27.53	28.2	30.27	29.13	28.09	30.86	29.58	26.2	31.14	28.2	30.27	29.13	28.09
19	26.66	28.99	33.15	27.69	27.03	27.18	24.98	27.99	29.32	31.99	28.28	27.69	27.03	27.18	24.98
20	27.31	25.77	24.93	25.22	28.51	28.56	26.59	28.19	29.92	24.9	23.73	25.22	28.51	28.56	26.59
21	27.15	25.42	26.97	28.18	26.45	26.26	24.1	28.98	32.05	26.97	26.61	28.18	26.45	26.26	24.1
22	27.7	28.01	28.4	27.41	26.93	28.69	24.04	26.13	32.61	24.17	25.59	27.41	26.93	28.69	24.04
23	29.07	30.4	24.1	28.22	31.84	29.68	25.12	28.47	32.71	28.04	26.82	28.22	31.84	29.68	25.12
24	31.72	25.88	27.16	31.17	32.05	23.83	24.23	30.03	34.86	30.65	26.21	31.17	32.05	23.83	24.23
1	30.76	27.18	35.12	29.19	28.33	25.89	25.01	27.27	27.22	24.81	31.92	29.19	28.33	25.89	25.01
2	27.44	34.67	32.57	32.6	32.17	33.7	29.56	25.07	24.15	32.31	28.37	32.6	32.17	33.7	29.56
3	28.99	33.42	32.31	29.93	31.09	32.19	30.01	25.28	30.49	34.15	26.54	29.93	31.09	32.19	30.01
4	32.18	32.04	26.55	30	31.15	29.93	31.03	25.52	34.45	29.36	31.38	30	31.15	29.93	31.03
5	30.85	28.13	24.47	26.75	28.23	33.14	25.79	33.03	34.16	30.85	30.03	26.75	28.23	33.14	25.79
6	30.55	31.29	23.88	26	23.61	25.26	26.77	33.93	32.19	33.36	31.37	26	23.61	25.26	26.77
7	29.46	27.13	25.53	31.63	22.85	23.9	23.76	33.04	27.53	32.12	27.45	31.63	22.85	23.9	23.76
8	29.52	30.86	33.62	32.55	27.3	31.83	23.76	30.45	31.88	31.43	31.6	30.66	33.26	33.01	29.91
9	29.9	29.69	31.85	31.71	31.6	31.32	32.19	31.28	34.66	28.94	29.76	31.08	27.51	30.54	31.66
10	28.54	26.23	30.77	27.75	33.69	28.1	28.88	28.14	29.55	27.88	28.89	29.8	27.12	29.72	30.05
11	26.55	28.22	29.17	29.5	24.77	31.71	25.14	27.86	33.82	27.45	28.1	31.2	34.41	30.28	31.77
12	27.27	30.68	31.21	30.75	28.07	32.38	32.53	31.14	32.47	31.5	30.54	31.38	31.9	31.54	29.61
13	29.66	31.52	30.07	30.15	29.68	29.41	32.27	29.36	33.47	32.39	30.8	30.23	31.89	30.96	30.13
14	28.72	31.09	30.49	29.37	27.97	30.4	28.43	31.44	34.2	31.9	31.16	29.34	31.71	29.96	30.1
15	28.96	30.43	28.78	29.07	33	30.56	30.77	31.51	29.73	30.56	31.66	30.32	32.88	31.36	30.55
16	28.33	31.6	30.73	26.62	27.52	28.24	27.76	29.69	34.4	31.61	27.43	29.62	29.56	28.85	28.75
17	31	28.35	30.49	27.48	27.97	29.3	33.72	30.77	28.33	27.16	30.41	29.72	33.14	30.57	30.06
18	29.28	27.29	30.26	28.2	30.27	29.13	28.09	30.16	31.75	30.05	29.83	27.88	31.36	28.67	30.7
19	26.41	30.34	27.54	27.69	27.03	27.18	24.98	28.43	27.42	28.1	28.24	27.92	28.27	27.37	27.86
20	28	23.58	27.27	25.22	28.51	28.56	26.59	28.75	30.39	23.9	24.25	28.96	27.7	26.82	24.6
21	28.15	31.17	26.66	28.18	26.45	26.26	24.1	32.86	33.57	25.84	28.79	27.4	30.23	26.36	25.18
22	31.52	25.47	27.33	27.41	26.93	28.69	24.04	29.36	33.77	27.74	27.52	25.92	28.42	26.5	27.75
23	23.91	32.22	24.66	28.22	31.84	29.68	25.12	28.76	29.1	24.51	23.85	28.35	26.86	27.04	25.22
24	24.9	32.28	29.72	31.17	32.05	23.83	24.23	31.74	31.26	28.94	23.85	32.53	29.23	26.85	26.07
1	32.39	24.45	27.03	29.19	28.33	25.89	25.01	30.15	27.67	30.76	24.1	29.56	32.22	28.18	24.46
2	31.73	26.22	27.75	32.6	32.17	33.7	29.56	26.22	33.28	28.74	29.91	30.7	32.3	29.76	30.46
3	31	33.87	31.19	29.93	31.09	32.19	30.01	30.32	34.19	29.52	32.55	31.71	31.7	32.19	31.19
4	29.84	32.48	29	30	31.15	29.93	31.03	33.41	29.65	25.01	31.34	31.44	30.58	32.85	29.47
5	26.01	24.36	24.76	26.75	28.23	33.14	25.79	32.85	32.35	29.19	28.55	31.14	27.65	29.57	29.94
6	27.53	23.38	25.5	26	23.61	25.26	26.77	29.46	29.73	30.33	27.97	28.54	25.36	28.37	29.42
7	27.47	23.46	29.49	27.22	24.05	23.92	29.31	32.62	29.54	29.35	31.51	30.93	31.68	24.96	24.57
8	26.18	30.43	31.54	30.78	33.05	31.07	29.3	26.13	26.3	27.73	29.76	30.97	32.7	33.09	31.17
