# Supplementary material for: Estrogen receptor alpha in the brain mediates tamoxifen-induced changes in physiology in mice
Source: eLife. 2021 Mar 1;10:e63333. doi: 10.7554/eLife.63333 (PMC7924955; doi:10.7554/eLife.63333)
Supplement: Figure 1—figure supplement 1—source data 2. — Average Ttail in light, dark, and total 24 hr periods. Each column is an independent mouse. [file elife-63333-fig1-figsupp1-data2.xlsx]

## Sheet: Sheet1
Source data for Figure 1 - Figure Supplement 1, panel b. Average Ttail in light, dark, and total 24 h periods. Each column is an independent mouse.
	WT_Oil								WT_Tmx
Light	29.7	30.2	30.4	29.7	29.5	29.58	29.85	30.16	30.4	31.2	30.9	30.8	30	31.8	30.1	32.35
Dark	28	29.4	27.6	29	28.1	27.83	26	26.03	28.6	28.1	29.1	28.4	29.5	29.2	28.5	30.25
24h	28.9	29.8	29	29.3	28.8	28.7	27.93	28.1	29.5	29.7	30	29.6	29.7	30.5	29.3	31.3
