# Supplementary material for: Estrogen receptor alpha in the brain mediates tamoxifen-induced changes in physiology in mice
Source: eLife. 2021 Mar 1;10:e63333. doi: 10.7554/eLife.63333 (PMC7924955; doi:10.7554/eLife.63333)
Supplement: Figure 1—figure supplement 1—source data 3. — Relative mRNA expression from brown adipose tissue (BAT) of Ucp1 and Adrb3 following oil or tamoxifen (Tmx) treatment. Each row is an independent mouse. [file elife-63333-fig1-figsupp1-data3.xlsx]

## Sheet: Sheet1
Source data for Figure 1 - Figure Supplement 1, panel c. Relative mRNA expression from BAT comparison of Ucp1 and Adrb3 following oil or tamoxifen (Tmx) treatment. Each row is an independent mouse.
Ucp1			Adrb3
WT_Oil	WT_Tmx		WT_Oil	WT_Tmx
0.991978	0.988961		1.2572	1.1384
1.20412	0.716729		1.0718	0.862
1.06661	1.02546		1.091	0.6586
0.800723	0.932571		0.7753	0.585
0.84652	0.708134		1.1143	0.5536
0.988226	0.860788		1.0372	0.8324
1.13266	0.687074		0.9194	0.8001
1.12607	0.780391		0.9543	1.0509
	0.578523			0.8683
	0.987209			0.7062
