# Supplementary material for: Estrogen receptor alpha in the brain mediates tamoxifen-induced changes in physiology in mice
Source: eLife. 2021 Mar 1;10:e63333. doi: 10.7554/eLife.63333 (PMC7924955; doi:10.7554/eLife.63333)
Supplement: Figure 1—source data 1. — Hourly average of core body temperature over 3 days before and 3 weeks after injections. Each column is an independent mouse. [file elife-63333-fig1-data1.xlsx]

## Sheet: Sheet1
Source data for Figure 1, panel b. Hourly average of core body temperature over 3 days before and 3 weeks after injections. Each column is an independent mouse.
Time,h	Oil								Tmx
7	37.08	37.21	37.64	37.85	37.78	37.27	38.19	37.63	36.67	37.07	37.01	36.491	37.12	37.02	37.34	37.78
8	37.07	37.06	38.26	36.73	36.75	37.99	38.04	37.32	36.79	36.95	37.1	36.35	36.92	37.28	36.47	36.75
9	37	36.89	37.45	36.88	36.31	37.32	37.92	37.21	36.81	36.65	36.73	36.51	37.14	37.41	36.4	36.31
10	37.11	36.93	37.03	36.92	36.67	37.02	38.1	37.32	36.71	36.49	36.58	36.77	37.09	37.13	37.1	36.67
11	36.83	36.89	36.89	36.89	37.56	37.32	37.96	37.25	37.47	36.69	36.65	37.25	36.83	37.2	36.43	37.56
12	36.76	37.17	37	37.09	36.72	36.99	38.08	37.37	37.28	36.52	36.8	37.59	36.78	37.33	36.31	36.72
13	36.83	37.02	37.11	37.02	36.42	37.2	38.13	37.35	37.02	36.65	36.88	37.59	36.85	37.48	36.3	36.42
14	36.7	37.17	37.1	36.96	36.74	37.35	37.89	37.24	37.08	36.64	36.51	37.32	37.17	37.62	36.96	36.74
15	37.01	37.29	37.41	36.91	37.41	37.43	37.86	37.36	36.85	36.99	36.83	37.47	37.19	37.53	36.98	37.41
16	37.02	37.2	37.56	37.06	37.01	37.02	37.78	37.27	37.22	36.84	36.79	37.22	37.06	37.69	36.67	37.01
17	37.23	37.42	37.6	37.13	36.89	37.2	37.78	37.49	37.24	36.77	37.2	37.43	37.19	38.07	36.64	36.89
18	37.38	37.25	37.47	37.46	37.22	37.54	37.88	37.2	37.26	36.89	37.21	37.09	37.75	38.13	37.13	37.22
19	37.85	38.01	37.83	37.41	37.61	38.13	38.39	37.54	37.8	37.84	37.53	37.18	37.38	38.14	37.53	37.61
20	37.65	38.34	38.75	38.25	37.88	38.17	38.06	37.52	37.84	37.8	37.33	36.97	38.42	38.63	37.96	37.88
21	38	37.87	38.45	37.93	37.82	37.83	38.04	37.35	37.77	37.87	37.27	36.78	37.96	38.38	37.53	37.82
22	37.36	38.3	38.14	37.58	37.88	38.21	38.26	37.41	38.01	37.57	36.73	36.89	38.16	38.45	37.19	37.88
23	37.2	37.94	38.01	38.35	38.09	38.37	38.35	37.51	37.93	37.75	37.22	36.8	37.83	38.32	37.11	38.09
24	37.32	37.4	38.5	37.79	37.47	38.17	38.24	37.67	37.84	38.02	37.52	37.27	38.03	38.38	36.42	37.47
1	36.93	38.02	38.31	36.82	36.4	37.6	37.68	37.5	38.25	38.16	37.78	37.14	37.93	38.08	36.85	36.4
2	37.7	37.32	37.59	36.86	36.55	37.24	38.11	37.55	38.08	38.03	37.65	36.43	37.51	38.19	36.45	36.55
3	37.4	37.24	37.15	36.77	36.58	37.55	38.23	37.77	38.29	38.01	37.12	36.59	37.54	38.07	36.76	36.58
4	37.02	37.91	37.34	37.27	36.46	37.02	38.5	37.6	37.45	37	36.42	36.45	37.73	38.28	36.69	36.46
5	37	38.57	38.3	37.78	37.11	36.96	37.82	37.42	37.17	36.59	36.51	36.49	37.52	38.11	37.32	37.11
6	36.77	38.35	37.98	38.04	37.67	37.71	37.78	37.24	36.98	36.78	36.51	36.37	37.17	37.93	37.61	37.66
7	36.69	37.61	38.07	37.9	37.78	37.27	38	37.1	37.23	37.06	37.44	36.36	36.83	37.63	37.11	37.56
8	37.12	37.08	37.58	36.79	36.78	37.83	38.08	37.04	37.51	36.8	37.07	36.94	36.66	37.23	36.71	37.2
9	36.99	37.37	37.25	37.16	37.68	38.07	37.98	37.12	36.79	36.45	36.59	36.67	37.29	37.36	36.07	36.93
10	36.88	37.26	36.79	37.05	37.45	37.63	38.09	37.47	37.37	36.17	36.59	36.4	37.27	37	35.13	36.17
11	36.76	37.4	36.75	36.71	37.49	37.28	38.04	37.39	36.98	36.04	36.61	36.01	36.8	36.99	35.29	35.79
12	36.84	37.58	36.71	36.71	36.72	36.99	38.09	37.33	37.05	36.34	36.4	36.11	36.55	37.05	35.56	35.39
13	37.1	37.31	36.72	36.93	36.42	37.2	37.98	37.24	36.64	36.14	36.43	35.83	36.57	36.79	35.61	35.85
14	36.86	37.18	36.55	36.77	36.74	37.35	37.97	37	36.51	35.92	36.2	35.97	36.54	36.72	35.83	35.68
15	36.88	37.07	36.61	36.67	37.41	37.43	37.7	37.27	36.63	36.51	36.49	35.85	36.4	36.89	35.92	35.56
16	37.03	36.84	36.94	36.59	37.01	37.02	37.78	37.05	36.35	36.31	36.39	35.99	36.66	36.9	36.37	35.75
17	37	36.87	37.51	36.71	36.89	37.2	37.86	37.25	36.68	36.59	36.94	35.89	36.85	36.75	36.72	36.61
18	37.27	37.27	37.06	37.41	37.22	37.54	37.81	37.33	36.99	36.62	36.76	36.97	37.27	37.2	36.92	36.85
19	37.76	38.09	38.03	37.64	37.61	38.13	38.15	37.75	37.56	37.59	37.18	37.28	38.02	37.17	37.58	37.64
20	37.7	37.94	38.03	38.14	37.88	38.17	38.34	37.82	37.88	37.61	36.91	37.47	37.8	38.11	37.51	37.97
21	37.62	37.63	38.29	37.86	37.82	37.83	38.45	37.57	37.67	37.69	36.82	37.23	38.16	37.42	37.61	37.83
22	37.43	37.64	37.84	37.57	37.88	38.21	38.14	37.52	37.26	38.08	36.57	37.68	37.65	37.39	37.59	37.8
23	37.8	37.77	37.28	37.77	38.09	38.37	38.44	37.59	37.27	37.49	36.86	37.74	37.48	37.85	37.74	37.67
24	37.67	37.21	38.04	37.06	37.47	38.17	37.77	37.52	37.06	37.62	36.82	37.55	37.93	37.86	37.69	37.81
1	37.47	37.02	38.25	36.89	36.4	37.6	38.42	37.44	37.55	37.05	36.83	37.08	37.79	37.48	36.59	37.39
2	37.71	37.15	37.47	37.23	36.55	37.24	38.41	37.62	37.94	37.16	37.62	36.13	37.63	36.81	36.54	37.57
3	37.32	37.13	36.96	36.67	36.58	37.55	38.49	37.64	37.37	36.91	36.7	36.24	37.75	36.76	36.81	37.36
4	37.24	38.36	36.74	36.96	36.46	37.02	38.5	37.41	36.39	36.09	36.67	36.04	37.25	36.99	36.77	37.02
5	37.11	38.47	37.39	37.8	37.11	36.96	37.68	37.06	36.14	36.3	36.62	35.95	37.71	37.45	36.88	36.67
6	36.98	38.31	38.32	37.65	37.66	37.04	37.82	37.19	36.49	36.54	36.3	36.41	37.56	37.18	36.98	37.31
7	36.98	37.61	38.46	37.59	37.56	37.73	37.88	37.32	36.86	37.02	36.95	37.27	36.69	36.52	36.28	36.18
8	36.82	36.79	37.43	36.77	37.2	38.14	38.09	37.26	35.81	36.13	36	36.23	36.43	36.22	35.8	36
