# Supplementary material for: Estrogen receptor alpha in the brain mediates tamoxifen-induced changes in physiology in mice
Source: eLife. 2021 Mar 1;10:e63333. doi: 10.7554/eLife.63333 (PMC7924955; doi:10.7554/eLife.63333)
Supplement: Figure 1—source data 2. — Average core body temperature in light, dark, and total 24 hr periods. Each column is an independent mouse. [file elife-63333-fig1-data2.xlsx]

## Sheet: Sheet1
Source data for Figure 1, panel c. Average core body temperature in light, dark and total 24 h periods. Each column is an independent mouse.
	WT_Oil								WT_Tmx
Light	36.6	36.74	36.77	36.93	36.99	37.13	37.11	37.221	36.51	36.4	36.26	36.49	36.08	36.59	36.6	36.87
Dark	37.25	37.45	37.49	37.28	37.69	37.91	37.84	37.617	37.41	37.04	37.33	37.16	37.29	37.46	37.52	37.52
24h	36.93	37.1	37.13	37.1	37.34	37.52	37.47	37.419	36.96	36.72	36.79	36.83	36.69	37.03	37.06	37.2
