# Supplementary material for: Estrogen receptor alpha in the brain mediates tamoxifen-induced changes in physiology in mice
Source: eLife. 2021 Mar 1;10:e63333. doi: 10.7554/eLife.63333 (PMC7924955; doi:10.7554/eLife.63333)
Supplement: Figure 1—source data 3. — Hourly heat loss index (HLI) calculated from continuous measurements of core and tail temperature. Each column is an independent mouse. [file elife-63333-fig1-data3.xlsx]

## Sheet: Sheet1
Source data for Figure 1, panel d. Hourly heat loss index (HLI) calculated from continuous measurements of core and tail temperature. Each column is an independent mouse.
time,h	Oil							Tmx
7	0.6	0.41	0.19	0.11	0.27	0.59	0.26	0.48	0.41	0.6	0.61	0.35	0.16	0.06	0.22
8	0.51	0.26	0.85	0.4	0.04	0.6	0.04	0.44	0.73	0.61	0.65	0.72	0.34	0.65	0.08
9	0.33	0.57	0.76	0.18	0.29	0.52	0.29	0.34	0.73	0.4	0.73	0.66	0.66	0.63	0.65
10	0.48	0.57	0.67	0.79	0.44	0.36	0.43	0.25	0.87	0.59	0.76	0.36	0.79	0.38	0.44
11	0.61	0.77	0.82	0.15	0.18	0.6	0.18	0.69	0.84	0.69	0.73	0.5	0.15	0.66	0.18
12	0.5	0.74	0.78	0.39	0.69	0.63	0.67	0.59	0.46	0.56	0.71	0.6	0.39	0.71	0.69
13	0.65	0.62	0.6	0.52	0.66	0.44	0.66	0.63	0.74	0.69	0.55	0.55	0.52	0.48	0.66
14	0.6	0.69	0.57	0.38	0.4	0.51	0.4	0.65	0.8	0.43	0.42	0.48	0.38	0.54	0.4
15	0.36	0.65	0.68	0.7	0.55	0.52	0.56	0.74	0.71	0.64	0.57	0.45	0.7	0.56	0.55
16	0.48	0.49	0.35	0.35	0.36	0.38	0.36	0.65	0.69	0.5	0.49	0.29	0.35	0.4	0.36
17	0.44	0.4	0.73	0.38	0.76	0.45	0.75	0.67	0.63	0.43	0.49	0.35	0.38	0.47	0.76
18	0.38	0.69	0.34	0.53	0.37	0.43	0.38	0.57	0.48	0.24	0.55	0.39	0.53	0.45	0.37
19	0.27	0.42	0.71	0.3	0.16	0.29	0.16	0.36	0.45	0.64	0.37	0.35	0.3	0.3	0.16
20	0.32	0.2	0.15	0.39	0.26	0.39	0.27	0.37	0.5	0.15	0.08	0.18	0.39	0.4	0.26
21	0.3	0.18	0.29	0.26	0.1	0.24	0.11	0.42	0.65	0.29	0.26	0.38	0.26	0.24	0.1
22	0.35	0.35	0.39	0.29	0.1	0.39	0.1	0.23	0.71	0.11	0.19	0.33	0.29	0.4	0.1
23	0.45	0.51	0.1	0.6	0.16	0.45	0.17	0.39	0.69	0.36	0.27	0.39	0.6	0.49	0.16
24	0.62	0.21	0.3	0.64	0.11	0.08	0.11	0.49	0.82	0.53	0.23	0.62	0.64	0.08	0.11
1	0.57	0.3	0.88	0.42	0.17	0.22	0.17	0.3	0.31	0.15	0.6	0.47	0.42	0.22	0.17
2	0.32	0.81	0.7	0.69	0.48	0.72	0.47	0.16	0.11	0.65	0.37	0.72	0.69	0.79	0.48
3	0.44	0.75	0.69	0.61	0.5	0.62	0.49	0.18	0.55	0.77	0.26	0.52	0.61	0.69	0.5
4	0.67	0.64	0.27	0.62	0.59	0.46	0.56	0.2	0.86	0.45	0.56	0.53	0.62	0.53	0.59
5	0.58	0.36	0.13	0.39	0.23	0.69	0.22	0.72	0.83	0.56	0.48	0.29	0.39	0.74	0.23
6	0.56	0.57	0.09	0.07	0.28	0.18	0.29	0.79	0.69	0.74	0.57	0.23	0.07	0.18	0.29
7	0.49	0.3	0.2	0.02	0.08	0.09	0.09	0.72	0.34	0.67	0.33	0.62	0.02	0.09	0.08
8	0.48	0.55	0.78	0.34	0.08	0.6	0.09	0.53	0.64	0.63	0.62	0.57	0.73	0.73	0.47
9	0.51	0.49	0.64	0.6	0.62	0.57	0.66	0.61	0.86	0.44	0.49	0.63	0.35	0.57	0.6
10	0.42	0.26	0.57	0.75	0.42	0.36	0.43	0.38	0.5	0.36	0.44	0.58	0.34	0.53	0.52
11	0.28	0.4	0.47	0.15	0.18	0.59	0.18	0.37	0.8	0.35	0.39	0.68	0.9	0.57	0.67
12	0.33	0.58	0.61	0.39	0.69	0.63	0.68	0.59	0.72	0.64	0.55	0.68	0.73	0.68	0.52
13	0.49	0.63	0.52	0.52	0.66	0.45	0.66	0.48	0.79	0.7	0.58	0.59	0.7	0.63	0.56
14	0.43	0.61	0.56	0.38	0.4	0.51	0.41	0.64	0.85	0.67	0.61	0.51	0.7	0.55	0.55
15	0.45	0.56	0.44	0.7	0.55	0.53	0.56	0.64	0.52	0.58	0.64	0.58	0.79	0.65	0.56
16	0.4	0.63	0.58	0.35	0.36	0.38	0.36	0.52	0.86	0.64	0.34	0.51	0.53	0.47	0.45
17	0.59	0.39	0.56	0.38	0.76	0.44	0.76	0.58	0.4	0.32	0.56	0.51	0.75	0.57	0.54
18	0.46	0.33	0.52	0.53	0.37	0.43	0.38	0.53	0.65	0.51	0.5	0.37	0.62	0.41	0.57
19	0.26	0.5	0.33	0.3	0.16	0.3	0.16	0.39	0.33	0.36	0.39	0.36	0.38	0.31	0.34
20	0.36	0.07	0.31	0.39	0.26	0.38	0.27	0.41	0.55	0.09	0.11	0.43	0.34	0.28	0.13
21	0.37	0.55	0.27	0.26	0.1	0.24	0.11	0.68	0.77	0.21	0.42	0.32	0.5	0.25	0.17
22	0.6	0.19	0.32	0.29	0.1	0.4	0.1	0.46	0.8	0.35	0.34	0.23	0.39	0.26	0.33
23	0.09	0.66	0.14	0.6	0.16	0.45	0.17	0.42	0.46	0.13	0.09	0.38	0.29	0.29	0.17
24	0.16	0.63	0.5	0.64	0.11	0.09	0.12	0.63	0.61	0.42	0.09	0.66	0.44	0.28	0.23
1	0.66	0.12	0.32	0.42	0.17	0.21	0.17	0.51	0.36	0.54	0.11	0.5	0.65	0.36	0.13
2	0.61	0.25	0.36	0.69	0.48	0.7	0.47	0.24	0.71	0.41	0.52	0.58	0.65	0.47	0.53
3	0.57	0.79	0.61	0.61	0.5	0.61	0.5	0.53	0.82	0.46	0.71	0.64	0.62	0.66	0.57
4	0.5	0.7	0.45	0.62	0.59	0.46	0.57	0.79	0.5	0.17	0.61	0.63	0.56	0.71	0.46
5	0.24	0.12	0.15	0.39	0.23	0.7	0.23	0.76	0.7	0.44	0.4	0.6	0.36	0.5	0.5
6	0.35	0.06	0.2	0.07	0.29	0.18	0.29	0.5	0.52	0.52	0.37	0.42	0.19	0.41	0.45
7	0.34	0.06	0.46	0.1	0.45	0.09	0.46	0.7	0.49	0.48	0.64	0.61	0.67	0.16	0.14
8	0.26	0.53	0.63	0.72	0.43	0.55	0.46	0.27	0.28	0.38	0.53	0.64	0.76	0.73	0.61
