# Supplementary material for: Estrogen receptor alpha in the brain mediates tamoxifen-induced changes in physiology in mice
Source: eLife. 2021 Mar 1;10:e63333. doi: 10.7554/eLife.63333 (PMC7924955; doi:10.7554/eLife.63333)
Supplement: Figure 1—source data 4. — Average HLI over the light, dark, and 24 hr periods. Each column is an independent mouse. [file elife-63333-fig1-data4.xlsx]

## Sheet: Sheet1
Source data for Figure 1, panel e. Average HLI over the light, dark, and 24 hour periods. Each column is an independent mouse.
	WT_Oil								WT_Tmx
Light	0.4981	0.5238	0.5393	0.4921	0.4691	0.4808	0.478	0.5208	0.562	0.619	0.595	0.581	0.535	0.652	0.519	0.711
Dark	0.3753	0.4452	0.3336	0.4367	0.3662	0.3523	0.2237	0.2343	0.419	0.375	0.438	0.391	0.491	0.461	0.396	0.54
24h	0.436	0.4834	0.434	0.4642	0.417	0.4157	0.3497	0.3759	0.489	0.493	0.514	0.484	0.513	0.556	0.456	0.624
