# Supplementary material for: Estrogen receptor alpha in the brain mediates tamoxifen-induced changes in physiology in mice
Source: eLife. 2021 Mar 1;10:e63333. doi: 10.7554/eLife.63333 (PMC7924955; doi:10.7554/eLife.63333)
Supplement: Figure 1—source data 5. — Quantification of temperature of skin above interscapular brown adipose tissue (BAT) depots. Each row is an independent mouse. [file elife-63333-fig1-data5.xlsx]

## Sheet: Sheet1
Source data for Figure 1, panel g. Quantification of temperature of skin above interscapular BAT depots. Each row is an independent mouse.
WT_Oil	WT_Tmx
34.2723	32.7464
35.5363	33.446
33.9065	34.2132
34.6278	33.4008
34.4581	32.9462
