# Supplementary material for: Estrogen receptor alpha in the brain mediates tamoxifen-induced changes in physiology in mice
Source: eLife. 2021 Mar 1;10:e63333. doi: 10.7554/eLife.63333 (PMC7924955; doi:10.7554/eLife.63333)
Supplement: Figure 2—source data 1. — Trabecular bone volume fraction, trabecular numbers, trabecular thickness, and trabecular separation in distal metaphysis of femurs. Each cell is an independent mouse. [file elife-63333-fig2-data1.xlsx]

## Sheet: Sheet1
Source data for Figure 2, panel b. Trabecular bone volume fraction (Tb.BV/TV), trabecular numbers (Tb.N), trabecular thickness (Tb.Th) and trabecular separation (Tb.Sp) in distal metaphysis of femurs. Each cell is an independent mouse.
Tb.BV/TV			Tb.N			Tb.Th			Tb.Sp
WT_Oil	WT_Tmx		WT_Oil	WT_Tmx		WT_Oil	WT_Tmx		WT_Oil	WT_Tmx
0.0861	0.257		4.4127	6.3857		0.0378	0.0511		0.225	0.1501
0.0889	0.2436		4.5679	5.7598		0.0356	0.0481		0.2179	0.1639
0.1542	0.2546		5.1552	6.5005		0.0424	0.0466		0.191	0.1463
0.1146	0.3674		4.7504	7.1835		0.039	0.0555		0.2079	0.1255
0.0651	0.3384		4.0368	6.6882		0.0432	0.0603		0.2508	0.1402
0.106	0.2529		4.7821	6.3042		0.0392	0.0509		0.2084	0.1476
