# Supplementary material for: Estrogen receptor alpha in the brain mediates tamoxifen-induced changes in physiology in mice
Source: eLife. 2021 Mar 1;10:e63333. doi: 10.7554/eLife.63333 (PMC7924955; doi:10.7554/eLife.63333)
Supplement: Figure 2—source data 2. — Bone volume fraction (Ct.BV/TV), cortical thickness (Ct.Th), bone mineral density (Ct.BMD), and cortical area (Ct.Ar) in diaphysis of femurs. Each cell is an independent mouse. [file elife-63333-fig2-data2.xlsx]

## Sheet: Sheet1
Source data for Figure 2, panel c. Bone volume fraction (Ct.BV/TV), cortical thickness (Ct.Th), bone mineral density (Ct.BMD) and cortical area (Ct.Ar) in diaphysis of femurs. Each cell is an independent mouse.
Ct.BV/TV			Ct.BMD			Ct.Th			Ct.Ar
WT_Veh	WT_Tax		WT_Veh	WT_Tax		WT_Veh	WT_Tax		WT_Veh	WT_Tax
0.4751	0.5479		1224.08	1224.78		0.18	0.192		0.681	0.574
0.5077	0.5553		1233.23	1235.53		0.205	0.228		0.755	0.883
0.5255	0.5626		1267.08	1232.91		0.208	0.229		0.768	0.831
0.512	0.6045		1237.9	1278.73		0.214	0.277		0.83	1.122
0.51	0.6661		1447.69	1457.53		0.202	0.299		0.729	1.049
0.5557	0.6519		1474.75	1493.31		0.227	0.262		0.83	0.812
