# Supplementary material for: Estrogen receptor alpha in the brain mediates tamoxifen-induced changes in physiology in mice
Source: eLife. 2021 Mar 1;10:e63333. doi: 10.7554/eLife.63333 (PMC7924955; doi:10.7554/eLife.63333)
Supplement: Figure 2—source data 3. — Hourly average of movement over 3 days before and 3 weeks after tamoxifen or oil injections, measured every 5 min using an intraperitoneal telemetry probe. Each column is an independent mouse. [file elife-63333-fig2-data3.xlsx]

## Sheet: Sheet1
Source data for Figure 2, panel d. Hourly average of movement over 3 days before and 3 weeks after tamoxifen or oil injections, measured every 5 min using an intraperitoneal telemetry probe. Each column is an independent mouse.
Time,h	Oil								Tmx
7	0.892	0.209	0.753	1.806	1.125	0.636	2.129	0.476	0.571	0.718	0.042	0.085	0.259	0.45	0.99	0.241
8	0.778	0.209	1.276	0.143	0.155	0.127	0.767	0.36	0.778	1.196	0.209	0.169	0.228	0.542	0.013	0.075
9	0.431	0.13	0.14	0.367	0.526	0.791	0.572	0.191	0.145	0.147	0.771	0.678	0.223	1.356	0.597	0.958
10	0.053	0.391	0.617	0.739	0.101	0.19	1.354	1.437	1.68	0.245	0.091	0.981	0.819	0.054	0.964	2.602
11	0.431	1.318	0.496	0.546	0.458	1.064	0.885	0.955	0.231	0.291	0.292	0.626	0.743	0.779	0.512	0.683
12	0.251	0.143	0.142	0.11	0.985	1.392	1.12	0.646	0.092	0.684	0.091	0.718	0.203	1.363	1.253	2.143
13	0.103	0.706	0.462	0.804	0.859	0.62	1.454	0.091	0.487	0.253	0.567	0.18	0.57	0.773	1.126	1.822
14	0.352	0.242	0.211	0.093	1.235	1.34	0.069	0.071	0.479	0.228	0.108	0.982	0.73	0.664	1.5	2.122
15	2.15	0.417	0.424	0.207	0.481	1.12	0.205	0.931	0.109	0.513	0.195	0.292	0.648	0.476	0.304	1.851
16	0.235	0.254	0.167	0.38	0.807	0.764	0.188	0.357	0.512	0.353	0.893	0.468	0.238	0.514	0.467	0.148
17	0.594	1.419	0.716	0.466	0.052	0.846	2.66	0.855	0.303	0.423	0.26	0.69	0.543	0.231	0.118	0.391
18	0.781	0.408	0.095	0.911	1.191	1.044	0.524	0.816	0.693	0.244	0.816	1.162	0.309	0.553	1.01	2.339
19	1.363	0.699	0.72	0.415	0.289	0.528	3.882	1.235	2.28	1.197	0.458	0.575	0.995	0.713	0.543	1.831
20	1.327	1.176	2.173	1.708	0.138	0.754	3.267	1.542	1.032	0.926	0.385	1.995	2.417	0.555	0.086	0.087
21	0.708	1.831	1.754	1.026	0.438	0.262	3.343	1.523	0.604	1.245	0.7	1.4	1.31	0.264	0.415	0.191
22	1.908	1.241	1.069	0.446	0.272	1.241	0.844	0.469	1.679	0.291	0.159	1.505	1.709	0.393	1.194	0.296
23	0.903	1.322	0.239	2.479	1.204	0.457	3.62	1.295	1.087	0.691	0.791	1.296	0.814	1.346	2.097	0.311
24	0.986	0.154	1.645	1.62	0.842	0.469	0.937	0.371	0.703	1.512	0.291	0.784	1.329	1.486	1.852	1.093
1	1.439	1.002	1.602	0.109	0.029	0.468	3.352	2.236	0.977	0.198	1.364	1.735	0.873	0.062	0.556	2.043
2	1.421	1.839	0.064	0.463	0.549	0.163	3.267	2.79	2.371	2.269	1.897	0.41	1.222	0.163	0.383	1.28
3	0.5	0.181	0.175	0.117	1.07	0.951	3.779	2.297	2.286	0.748	0.362	0.484	1.421	0.894	1.162	0.301
4	1.076	0.922	0.395	1.174	1.082	0.744	3.279	0.705	2.235	0.324	0.035	1.284	0.314	1.642	0.172	0.49
5	0.654	1.622	1.194	1.858	0.103	0.324	0.788	0.027	0.001	0.16	0.43	0.863	0.704	0.373	0.403	0.224
6	0.304	0.884	0.323	2.08	0.656	0.034	0.213	1.074	0.093	0.806	0.208	0.274	0.301	0.293	0.962	0.412
7	0.827	0.181	1.425	2.037	0.45	0.652	0.885	0.849	0.245	0.921	0.97	0.049	0.265	0.583	0.632	0.146
8	0.081	0.339	0.893	0.162	0.542	0.018	1.39	0.162	0.391	0.736	0.864	0.218	0.118	0.768	0.171	0.13
9	0.576	0.299	0.152	0.345	1.356	0.603	0.171	0.239	1.028	0.282	0.748	0.685	0.409	0.503	0.607	0.367
10	0.738	0.963	1.296	0.846	0.054	0.317	1.398	1.032	0.355	0.403	0.564	1.085	1.563	1.756	0.093	0.979
11	0.453	0.432	0.301	0.359	0.779	1.4	1.162	0.959	0.082	0.568	0.558	0.453	0.321	0.096	1.103	0.065
12	0.59	0.196	0.672	0.107	1.363	1.236	1	0.395	0.255	0.158	0.905	0.176	0.099	0.484	0.095	0.327
13	0.222	0.256	0.162	0.764	0.773	0.778	0.164	0.17	0.863	0.278	0.267	0.439	0.155	0.694	0.532	0.188
14	1.527	0.193	0.96	0.652	0.664	1.925	0.555	0.24	0.156	0.271	0.039	0.501	0.354	0.932	0.498	0.114
15	0.778	0.833	0.14	0.194	0.476	1.005	0.384	0.279	0.185	0.22	0.431	0.227	0.648	0.26	0.124	0.13
16	0.327	0.391	0.66	0.097	0.514	1.103	0.66	1.178	0.927	0.486	0.395	0.766	0.375	0.907	0.957	0.814
17	1.073	0.101	0.987	0.612	0.231	0.911	1.566	0.025	0.229	0.338	0.761	0.826	0.824	0.313	0.398	0.221
18	0.597	0.773	0.884	0.716	0.553	0.73	0.432	1.412	0.639	0.41	0.311	0.617	0.218	0.535	0.537	1.134
19	1.364	1.549	1.208	0.929	0.713	0.275	1.548	1.672	1.011	0.961	0.673	1.548	1.604	0.87	0.647	1.461
20	1.956	1.278	1.067	1.155	0.555	0.533	2.19	0.769	1.232	0.763	0.573	1.43	1.129	1.478	0.954	1.218
21	0.459	0.956	0.752	1.223	0.264	0.716	1.719	0.554	1.001	0.832	0.4	0.549	1.058	0.816	1.71	0.922
22	0.341	0.957	1.276	1.395	0.393	0.355	2.513	2.32	1.286	0.521	1.219	1.206	0.767	0.864	0.586	0.723
23	1.438	1.425	1.18	1.232	1.346	0.985	0.671	2.88	0.145	0.674	0.366	1.509	0.924	0.665	0.485	1.298
24	0.655	1.027	1.075	0.536	1.486	0.406	1.67	3.168	1.087	0.754	0.637	1.048	1.269	1.853	1.373	0.926
1	0.551	0.783	1.25	0.303	0.062	1.873	2.025	1.066	0.463	0.83	0.86	1.293	1.827	0.652	1.977	1.196
2	0.372	0.467	0.602	0.563	0.163	0.772	2.991	1.243	1.367	0.315	0.339	0.967	0.934	0.068	0.174	0.104
3	0.482	0.918	0.262	0.878	0.894	0.342	1.415	2.912	1.105	1.068	0.749	1.065	0.568	0.268	0.601	0.442
4	0.299	2.116	0.539	0.834	1.642	0.313	1.099	2.723	0.829	0.31	1.013	0.64	0.249	0.378	0.19	0.188
5	2.062	2.469	1.109	1.797	0.373	0.036	0.713	2.535	0.252	0.681	0.122	1.176	1.17	0.372	0.531	0.184
6	0.886	0.812	0.851	1.965	0.293	1.034	0.297	0.176	0.106	0.19	0.583	1.409	0.317	1.493	0.488	1.282
7	0.649	0.109	1.966	1.342	0.583	0.259	2.335	0.101	0.256	0.263	0.877	0.991	0.08	0.362	2.156	1.781
8	0.344	0.199	0.654	0.097	0.768	0.859	0.889	0.938	0.478	0.184	1.936	0.301	0.068	0.15	0.05	0.619
