# Supplementary material for: Estrogen receptor alpha in the brain mediates tamoxifen-induced changes in physiology in mice
Source: eLife. 2021 Mar 1;10:e63333. doi: 10.7554/eLife.63333 (PMC7924955; doi:10.7554/eLife.63333)
Supplement: Figure 2—source data 4. — Average total movement in the light, dark, and total 24 hr periods. Each column is an independent mouse. [file elife-63333-fig2-data4.xlsx]

## Sheet: Sheet1
Source data for Figure 2, panel e. Average total movement in the light, dark, and total 24 h periods. Each column is an independent mouse.
	WT_Oil								WT_Tmx
Light	4.98	6.57	6.14	7.44	6.59	5.01	6.55	10.28	5.13	5.27	4.69	5.31	4.65	3.93	6.06	6.61
Dark	10.14	12.36	14.97	11.29	13.76	14.5	15.1	18.08	13.04	9.39	12.93	9.67	11.5	11.94	10.4	13.7
24h	15.12	18.93	21.11	18.74	20.35	19.46	21.61	28.36	18.17	14.65	17.63	14.98	16.16	15.87	16.45	20.31
