# Supplementary material for: Estrogen receptor alpha in the brain mediates tamoxifen-induced changes in physiology in mice
Source: eLife. 2021 Mar 1;10:e63333. doi: 10.7554/eLife.63333 (PMC7924955; doi:10.7554/eLife.63333)
Supplement: Figure 2—source data 5. — Body weight over 28 days during tamoxifen or oil injection. Each column is an independent mouse. [file elife-63333-fig2-data5.xlsx]

## Sheet: Sheet1
Source data for Figure 2, panel f. Body weight over 28 days during tamoxifen or oil injection. Each column is an independent mouse.
Day from injection	Oil									Tmx
-1	23.9	23.1	23.05	23.15	21.65	22.3	20.75	22.55	19.2	18.8	22.35	21.5	25.05	21.15	19.8	20.75	20.5	22.65	21.85	23.25
0	23.6	23.3	22.9	23.2	21.9	22.4	20.7	22.8	19.6	18.8	22.1	21.5	24.9	22.1	20.5	20.8	20.7	22.7	22.2	23.5
1
2
3	24	23.2	24.4	23.8	22.2	22.3	20.5	23.1	19.2	18.5	23	22	25.6	21.6	20.4	20.7	21	23.5	23.1	24
4
5
6	23.3	23.2	24.5	24.5	22.7	23	21.2	22.8	19.2	18.8	23.7	23.3	25.6	21.7	20.8	20.8	21.2	23.8	22.4	23.9
7
8
9	23.8	24.1	25	24.6	23	22.8	21.5	23.7	20.4	19.4	23.7	24.2	25.2	22	20.9	21.6	21.4	24.4	23.6	24.5
10
11
12	23.8	25	23.4	24.8	23.5	23.7	21.2	23.3	20.9	19.4	23.9	23.9	26	22.1	21	21.4	21.8	24.4	23.5	24.6
13
14
15	24.3	24.7	25.8	25.3	23.2	23.7	21.2	24	21	19.4	25.3	23.8	26.6	22.6	20.7	21.9	21.2	23.6	24.4	24.7
16
17
18	24.8	24.6	25.7	25.9	23.4	23.5	22.9			19.7	24.8	24.6	26.5	22.7	20.6	22.2	21.9	24.4
19
20
21	24.4	25	26.8	26	23.9	24.2	23.8			19.6	24.9	24.1	27	23.1	21.2	22.5	22.5	25.7
22
23
24	25.2	24.9	26.4	26.1	23.8	24.2	23.4			20.6	26	24.5	27.3	23.2	21.2	23.1	22.5	25.6
25
26
27	25.3	25.2	26.5	26.6	24.3	24.3	22.4			20.1	27	25.6	28.3	23.6	21.4	22.6	22.3	25.5
28
29	26.5	26.8	27.4	26.1	24.7	24.4	22.2			20.5	27.9	26.1	28.9	23.3	21.9	22.9	22.8	26
