# Supplementary material for: Estrogen receptor alpha in the brain mediates tamoxifen-induced changes in physiology in mice
Source: eLife. 2021 Mar 1;10:e63333. doi: 10.7554/eLife.63333 (PMC7924955; doi:10.7554/eLife.63333)
Supplement: Figure 6—source data 1. — Hourly average of core body temperature in Esr1 cKO female mice over 2 days before and 3 weeks after injections. Each column is an independent mouse. [file elife-63333-fig6-data1.xlsx]

## Sheet: Sheet1
Source data for Figure 6, panel a. Hourly average of core body temperature in Esr1 cKO female mice over 2 days before and 3 weeks after injections. Each column is an independent mouse.
Time,h	cKO_Oil									cKO_Tax
7	37.6	37.9	37.4	37.85	37.51	38	37.42	37.02		37.33	37.35	37.18	37.39	37.37	37.59	37.98
8	37.46	37.51	37.62	37.77	37.5	37.67	37.34	37.13		37.27	37.26	37.24	37.62	37.5	37.71	37.39
9	37.28	37.47	37.54	37.61	37.13	37.22	37.47	37.19		37.24	37.09	37.04	37.47	37.46	37.58	37.3
10	37.17	37.43	37.33	37.69	36.95	37.1	37.62	36.75		37.19	36.93	37.09	37.23	37.4	37.66	37.31
11	37.21	37.41	37.47	37.48	37.02	37.46	37.41	36.88		37.19	36.9	37.17	37.21	37.28	37.75	37.34
12	37.3	37.53	37.29	37.38	37.05	37.16	37.43	37.02		37.13	36.88	37.37	37.45	37.29	37.75	37.2
13	37.15	37.44	37.25	37.41	37	37.13	37.15	36.95		37.04	36.76	37.14	37.38	37.27	37.77	37.12
14	37.07	37.41	37.32	37.33	36.98	37.22	37.46	36.75		37.26	36.72	37.08	37.45	37.3	37.84	37.1
15	37	37.44	37.25	37.34	36.99	37.08	37.81	36.89		37.22	36.66	37.08	37.35	37.14	37.62	37.04
16	37.09	37.36	37.39	37.35	37.14	37.15	37.44	36.96		37.16	36.62	37.26	37.2	37.18	37.6	36.96
17	37.03	37.24	37.39	37.55	37.22	37.22	37.45	37.11		37.09	36.85	37.13	37.27	37.26	37.46	37.12
18	37.13	37.33	37.47	37.61	37.25	37.21	37.21	36.81		37.18	36.84	37.3	37.18	37.45	37.83	37.59
19	37.3	37.84	37.85	38.07	37.34	37.57	37.65	36.76		37.49	37.23	37.37	38.06	37.4	37.63	37.89
20	37.43	37.74	37.84	37.99	37.53	37.09	37.93	37.1		37.61	37.25	37.4	37.48	37.87	38.41	37.77
21	37.36	37.81	37.78	38.08	37.46	37.69	37.6	37.04		37.33	36.97	37.48	37.59	37.7	38.19	37.4
22	37.32	37.89	37.38	37.62	37.5	37.54	37.43	37.13		37.39	37.48	37.41	37.42	37.46	38.17	37.47
23	37.64	37.94	37.37	37.51	37.43	37.6	37.79	37.15		37.37	37.39	36.97	37.67	37.88	37.87	38.29
24	37.64	38.09	37.54	37.84	37.77	37.69	37.92	37		37.28	37.26	37.55	37.74	37.56	37.79	37.61
1	37.66	38.19	37.8	38.03	37.46	37.23	37.94	37.34		37.33	37.31	37.58	38	37.33	37.99	37.18
2	37.34	37.75	37.82	38.03	37.71	37.4	37.37	37.1		37.54	36.92	37.6	38.08	37.21	38.2	37.15
3	37.1	37.84	37.78	38.11	37.52	37.57	37.02	37.35		37.88	37.38	37.6	37.99	37.52	38.29	37.27
4	37.34	37.54	37.7	37.81	37.35	37.27	37.13	37.24		37.76	37.62	37.38	37.69	37.9	38.3	37.32
5	37.3	37.55	37.52	37.78	37.17	37.45	37.5	37.18		37.59	37.5	37.49	37.62	37.95	37.93	37.39
6	37.31	37.78	37.6	37.81	37.12	37.38	37.86	37.24		37.33	37.07	37.3	37.67	37.95	37.96	37.6
7	37.45	37.89	37.55	37.76	37.14	37.75	37.25	37.2		37.18	36.76	37.23	37.59	37.42	37.95	37.8
8	37.27	37.4	37.69	37.6	36.81	37.36	37.23	37.06		37.32	36.76	37.3	37.59	37.21	37.85	37.32
9	37.14	37.35	37.44	37.46	37.33	37.42	37.42	36.94		37.45	36.78	37.3	37.6	37.32	37.76	37.41
10	37.07	37.25	37.48	37.46	37.1	37.47	37.36	36.88		37.34	36.6	37.15	37.54	37.07	37.78	37.2
11	37.06	37.39	37.27	37.44	36.96	37.37	37.37	36.85		37.3	36.61	37.15	37.47	36.93	37.8	37.07
12	37.08	37.52	37.36	37.44	36.9	37.27	37.34	37.04		37.1	36.67	37.09	37.36	37	37.6	37.16
13	37.08	37.39	37.43	37.58	36.89	37.1	37.2	36.85		36.7	36.9	37	37.33	37.17	37.68	37.04
14	36.84	37.25	37.36	37.5	36.88	37.21	37.5	36.8		36.96	36.73	36.84	37.31	37.15	37.6	36.8
15	36.9	37.38	37.3	37.57	36.85	37.22	37.39	36.76		37.01	36.76	36.95	37.36	37.05	37.6	36.64
16	36.91	37.41	37.32	37.54	36.96	37.38	37.43	36.81		37.03	36.72	36.82	37.27	37.12	37.48	37.13
17	37.26	37.23	37.29	37.33	37.14	37.3	37.22	36.97		37.05	37.17	36.91	37.32	37.22	37.42	37.39
18	37.2	37.26	37.24	37.7	37.25	37.96	37.47	36.84		37.31	36.77	37.09	37.45	37.22	37.78	37.5
19	37.53	37.74	37.79	37.66	37.39	37.71	37.89	36.75		37.42	37.83	37.47	38.16	37.62	37.74	38.24
20	37.47	37.65	38.02	38.05	37.67	37.59	37.78	37.03		37.34	37.76	37.26	38.1	37.77	38.52	37.94
21	37.27	37.84	37.59	37.92	37.48	37.29	37.32	36.92		37.52	37.83	37.51	37.67	37.32	38.24	37.54
22	37.3	37.87	37.46	37.77	37.24	37.86	37.7	36.95		37.64	37.82	37.87	38.16	37.82	37.84	37.44
23	37.57	37.86	37.39	37.65	37.1	37.78	37.98	37.12		37.59	37.99	37.5	37.77	37.73	38.16	37.34
24	37.57	37.94	37.52	37.82	37.31	37.3	37.93	37.18		37.44	37.52	37.45	37.97	37.34	37.75	37.98
1	37.03	37.67	37.47	37.99	37.34	37.26	37.56	37.16		37.44	37.88	37.68	37.97	37.23	37.95	37.66
2	37.2	37.74	37.57	37.9	37.24	37.2	37.55	37.19		37.53	37.42	37.81	37.9	37.09	38.16	36.94
3	37.04	37.85	37.75	37.61	37.5	37.29	37.55	37.01		37.78	38.04	38.09	37.82	36.98	37.75	36.91
4	37.42	37.75	37.74	37.98	37.56	37.04	37.66	37.02		37.32	37.66	37.73	37.58	37.47	37.84	36.98
5	37.36	37.86	37.44	38.12	37.36	36.98	37.88	37.05		37.42	37.79	37.39	37.97	37.91	37.77	37.42
6	37.32	37.78	37.3	37.62	37.11	37.66	37.45	37.23		37.34	37.34	37.23	37.95	37.81	38.15	37.79
7	37.3	37.84	37.36	37.46	36.99	37.98	37.37	37.27		37.25	37.3	37.24	37.39	37.54	38.09	37.21
8	37.28	37.47	37.27	37.63	36.9	37.39	37.36	37.18		37.25	37.17	37.03	37.32	37.05	37.48	36.89
