# Supplementary material for: Estrogen receptor alpha in the brain mediates tamoxifen-induced changes in physiology in mice
Source: eLife. 2021 Mar 1;10:e63333. doi: 10.7554/eLife.63333 (PMC7924955; doi:10.7554/eLife.63333)
Supplement: Figure 6—source data 2. — Average core body temperature from Esr1 cKO mice in light, dark, and total 24 hr periods. Each column is an independent mouse. [file elife-63333-fig6-data2.xlsx]

## Sheet: Sheet1
Source data for Figure 6, panel b. Average core body temperature from Esr1 cKO mice in light, dark, and total 24 h periods. Each column is an independent mouse.
	cKO_Oil								cKO_Tmx
Light	36.88	37.24	37.35	37.25	38	37	37.34	36.9	36.96	36.95	37.13	37.08	37.07	37.13	37	38
Dark	37.01	37.46	37.68	37.53	38	37	37.47	37.16	37.23	37.54	37.45	37.76	37.53	37.71	38	38
24h	36.94	37.35	37.52	37.39	38	37	37.41	37.03	37.09	37.24	37.29	37.42	37.3	37.42	37	38
