# Supplementary material for: Estrogen receptor alpha in the brain mediates tamoxifen-induced changes in physiology in mice
Source: eLife. 2021 Mar 1;10:e63333. doi: 10.7554/eLife.63333 (PMC7924955; doi:10.7554/eLife.63333)
Supplement: Figure 6—source data 3. — Hourly average of heat loss index (HLI) calculated from continuous measurements of core and tail temperature in Esr1 cKO female mice treated with oil or Tmx. Each column is an independent mouse. [file elife-63333-fig6-data3.xlsx]

## Sheet: Sheet1
Source data for Figure 6, panel c. Hourly average of Heat loss index (HLI) calculated from continuous measurements of core and tail temperature in Esr1 cKO female mice treated with oil or Tmx. Each column is an independent mouse.
time,h	cKO_Oil							cKO_Tmx
7	0.39	0.57	0.64	0.26	0.23	0.56	0.76	0.62	0.47	0.78	0.74	0.17	0.75	0.24
8	0.68	0.7	0.53	0.55	0.73	0.83	0.87	0.61	0.35	0.73	0.68	0.72	0.55	0.7
9	0.37	0.62	0.71	0.89	0.32	0.46	0.81	0.64	0.51	0.5	0.65	0.75	0.73	0.58
10	0.49	0.69	0.85	0.89	0.8	0.23	0.54	0.65	0.44	0.76	0.75	0.79	0.23	0.54
11	0.7	0.57	0.83	0.83	0.35	0.8	0.3	0.59	0.42	0.77	0.79	0.36	0.79	0.3
12	0.53	0.63	0.79	0.82	0.77	0.78	0.77	0.43	0.2	0.76	0.82	0.77	0.79	0.78
13	0.43	0.67	0.8	0.87	0.78	0.79	0.76	0.58	0.45	0.69	0.68	0.78	0.77	0.78
14	0.49	0.7	0.76	0.85	0.3	0.41	0.42	0.66	0.48	0.66	0.74	0.3	0.41	0.43
15	0.43	0.47	0.73	0.73	0.73	0.63	0.76	0.69	0.43	0.76	0.69	0.73	0.64	0.78
16	0.55	0.61	0.48	0.51	0.6	0.67	0.71	0.63	0.32	0.45	0.65	0.6	0.68	0.72
17	0.35	0.67	0.53	0.45	0.56	0.56	0.54	0.5	0.28	0.62	0.64	0.57	0.57	0.54
18	0.44	0.47	0.64	0.71	0.59	0.4	0.79	0.52	0.26	0.36	0.54	0.57	0.41	0.79
19	0.18	0.27	0.18	0.44	0.3	0.33	0.38	0.26	0.16	0.51	0.58	0.29	0.33	0.37
20	0.22	0.11	0.25	0.4	0.75	0.22	0.41	0.52	0.27	0.29	0.24	0.72	0.22	0.41
21	0.42	0.13	0.17	0.26	0.39	0.68	0.46	0.65	0.36	0.45	0.16	0.4	0.68	0.46
22	0.31	0.69	0.77	0.6	0.78	0.1	0.4	0.19	0.16	0.68	0.13	0.78	0.1	0.4
23	0.38	0.84	0.72	0.76	0.29	0.12	0.67	0.42	0.25	0.14	0.6	0.28	0.12	0.66
24	0.19	0.76	0.36	0.16	0.32	0.34	0.46	0.63	0.24	0.65	0.77	0.32	0.34	0.45
1	0.53	0.41	0.2	0.52	0.83	0.67	0.41	0.4	0.21	0.73	0.37	0.84	0.69	0.41
2	0.56	0.18	0.3	0.17	0.74	0.55	0.42	0.15	0.29	0.61	0.11	0.75	0.55	0.41
3	0.46	0.2	0.18	0.6	0.65	0.66	0.87	0.08	0.4	0.4	0.1	0.66	0.64	0.86
4	0.56	0.38	0.82	0.75	0.76	0.41	0.75	0.29	0.36	0.09	0.1	0.76	0.39	0.75
5	0.44	0.54	0.74	0.65	0.74	0.1	0.51	0.82	0.4	0.08	0.52	0.74	0.1	0.5
6	0.53	0.67	0.66	0.58	0.66	0.1	0.58	0.67	0.48	0.12	0.72	0.65	0.1	0.58
7	0.47	0.49	0.45	0.87	0.09	0.14	0.82	0.54	0.4	0.64	0.47	0.09	0.13	0.82
8	0.63	0.73	0.64	0.73	0.72	0.56	0.71	0.47	0.7	0.61	0.75	0.69	0.58	0.65
9	0.78	0.69	0.68	0.7	0.74	0.71	0.59	0.71	0.79	0.52	0.63	0.55	0.61	0.64
10	0.61	0.66	0.59	0.75	0.78	0.23	0.54	0.69	0.54	0.49	0.6	0.68	0.75	0.38
11	0.52	0.7	0.57	0.44	0.35	0.8	0.3	0.78	0.64	0.41	0.58	0.7	0.8	0.52
12	0.67	0.88	0.71	0.84	0.76	0.79	0.77	0.65	0.55	0.65	0.75	0.66	0.76	0.53
13	0.76	0.79	0.68	0.75	0.78	0.78	0.77	0.76	0.6	0.71	0.71	0.53	0.82	0.58
14	0.7	0.51	0.72	0.86	0.3	0.41	0.42	0.74	0.65	0.62	0.68	0.61	0.77	0.48
15	0.6	0.82	0.63	0.8	0.72	0.64	0.77	0.65	0.64	0.58	0.67	0.62	0.73	0.7
16	0.5	0.78	0.57	0.72	0.59	0.67	0.72	0.58	0.53	0.67	0.72	0.38	0.87	0.44
17	0.38	0.7	0.46	0.63	0.56	0.57	0.54	0.57	0.42	0.51	0.45	0.49	0.62	0.49
18	0.42	0.58	0.5	0.43	0.56	0.4	0.79	0.58	0.43	0.48	0.48	0.39	0.72	0.64
19	0.3	0.34	0.2	0.61	0.3	0.32	0.38	0.23	0.11	0.21	0.38	0.21	0.29	0.2
20	0.37	0.13	0.25	0.18	0.73	0.22	0.41	0.48	0.31	0.25	0.09	0.13	0.12	0.11
21	0.44	0.29	0.23	0.56	0.4	0.69	0.47	0.28	0.63	0.29	0.07	0.38	0.65	0.32
22	0.37	0.79	0.79	0.66	0.76	0.1	0.41	0.39	0.19	0.58	0.28	0.27	0.82	0.24
23	0.36	0.78	0.28	0.34	0.29	0.12	0.67	0.4	0.3	0.1	0.44	0.62	0.33	0.14
24	0.25	0.74	0.56	0.12	0.33	0.34	0.45	0.13	0.71	0.53	0.08	0.43	0.52	0.44
1	0.48	0.36	0.74	0.83	0.83	0.69	0.41	0.15	0.14	0.67	0.07	0.38	0.85	0.66
2	0.76	0.09	0.22	0.7	0.75	0.54	0.41	0.26	0.11	0.5	0.35	0.62	0.78	0.66
3	0.7	0.12	0.11	0.18	0.66	0.63	0.89	0.2	0.36	0.45	0.76	0.83	0.86	0.3
4	0.62	0.09	0.2	0.15	0.78	0.39	0.76	0.77	0.07	0.36	0.32	0.78	0.35	0.52
5	0.57	0.52	0.7	0.75	0.76	0.1	0.51	0.76	0.06	0.08	0.1	0.6	0.35	0.3
6	0.44	0.85	0.49	0.87	0.65	0.1	0.58	0.78	0.43	0.07	0.17	0.26	0.31	0.14
7	0.43	0.89	0.74	0.7	0.45	0.45	0.84	0.72	0.82	0.3	0.77	0.64	0.88	0.79
8	0.75	0.71	0.3	0.65	0.78	0.33	0.78	0.4	0.7	0.54	0.68	0.61	0.85	0.68
