# Supplementary material for: Estrogen receptor alpha in the brain mediates tamoxifen-induced changes in physiology in mice
Source: eLife. 2021 Mar 1;10:e63333. doi: 10.7554/eLife.63333 (PMC7924955; doi:10.7554/eLife.63333)
Supplement: Figure 6—source data 4. — Average heat loss index (HLI) in the light, dark, and total 24 hr periods for Esr1 cKO female mice treated with oil or Tmx. Each column is an independent mouse. [file elife-63333-fig6-data4.xlsx]

## Sheet: Sheet1
Source data for Figure 6, panel d. Average HLI in the light, dark, and total 24 h periods for Esr1 cKO female mice treated with oil or tmx. Each column is an independent mouse.
	cKO_Oil							cKO_Tmx
	20	30	36	38	40	45	46	15	27	29	33	35	40	45	46
Light	0.6128	0.6063	0.6045	0.7036	0.717	0.62812	0.727	0.571	0.63894	0.605609	0.572776	0.657089	0.566712	0.721512	0.550694
Dark	0.4614	0.4046	0.3261	0.4756	0.6994	0.364844	0.576	0.379	0.392437	0.286656	0.254351	0.30302	0.487642	0.543817	0.369031
24h	0.5368	0.5045	0.4637	0.5884	0.7082	0.495526	0.649	0.474	0.513787	0.443037	0.410866	0.477681	0.526492	0.632749	0.45905
