# Supplementary material for: Estrogen receptor alpha in the brain mediates tamoxifen-induced changes in physiology in mice
Source: eLife. 2021 Mar 1;10:e63333. doi: 10.7554/eLife.63333 (PMC7924955; doi:10.7554/eLife.63333)
Supplement: Figure 6—source data 5. — Quantification of temperature of skin above intrascapular brown adipose tissue (BAT) depots in Esr1 cKO female mice treated with oil or Tmx. Each cell is an independent mouse. [file elife-63333-fig6-data5.xlsx]

## Sheet: Sheet1
Source data for Figure 6, panel f. Quantification of temperature of skin above intrascapular BAT depots in Esr1 cKO female mice treated with oil or Tmx. Each cell is an independent mouse.
cKO_Oil	cKO_Tmx
33.1621	33.3747
33.8237	33.7186
34.3034	33.9063
