# Supplementary material for: Estrogen receptor alpha in the brain mediates tamoxifen-induced changes in physiology in mice
Source: eLife. 2021 Mar 1;10:e63333. doi: 10.7554/eLife.63333 (PMC7924955; doi:10.7554/eLife.63333)
Supplement: Figure 6—source data 6. — Hourly average of movement over 2 days before and 3 weeks after injections of oil or tamoxifen in Esr1 cKO female mice. Each column is an independent mouse. [file elife-63333-fig6-data6.xlsx]

## Sheet: Sheet1
Source data for Figure 6, panel g. Hourly average of movement over 2 days before and 3 weeks after injections of oil or tamoxifen in Esr1 cKO female mice. Each column is an independent mouse.
Time,h	cKO_Veh								cKO_Tax
7	0.765	1.446	0.416	1.518	0.779	1.05	1.82	1.606	0.208	0.419	0.871	0.324	0.796	0.66	0.792
8	0.138	0.115	1.273	0.343	0.738	0.714	0.51	0.242	0.562	0.716	0.284	0.65	0.984	0.37	0.926
9	0.758	0.106	1.221	1.25	0.209	0.791	0.77	0.057	0.619	1.009	0.287	0.742	0.522	0.98	0.29
10	0.227	0.765	0.271	0.269	0.988	0.739	0.6	0.995	0.065	0.047	0.072	0.905	0.99	0.44	1.314
11	0.132	0.462	0.341	0.584	0.579	0.294	0.56	0.862	0.505	0.453	1.274	0.459	0.222	1.16	0.713
12	0.237	0.433	0.409	0.101	0.203	0.37	0.82	1.89	0.238	0.296	0.089	0.522	0.803	1.25	0.817
13	0.577	0.712	0.673	0.387	0.219	0.064	0.15	2.277	0.436	1.338	0.043	0.449	0.958	0.68	0.915
14	0.447	0.173	0.235	0.697	0.175	0.422	1.73	0.384	0.078	0.322	0.373	0.514	0.39	0.53	0.422
15	0.316	0.18	0.476	0.201	0.379	0.293	0.17	1.224	0.123	0.3	0.301	0.339	0.597	1.51	1.366
16	0.326	0.369	0.659	0.815	0.681	0.344	1.46	2.587	0.937	0.843	0.551	0.363	0.549	2.47	1.06
17	0.78	0.505	0.16	0.111	0.389	0.688	1.87	2.511	0.254	0.592	0.643	0.55	0.547	0.56	0.64
18	0.56	0.785	0.68	0.244	0.717	1.067	0.34	2.366	1.316	0.891	1.384	1.182	1.815	0.28	0.781
19	0.774	0.941	1.785	1.842	2.194	0.982	0.52	0.29	1.657	1.146	1.791	1.222	1.096	0.14	0.593
20	1.131	0.291	0.811	1.886	1.634	1.011	0.82	0.233	1.548	0.474	0.659	1.388	1.992	1.12	1.035
21	0.488	1.942	0.992	2.477	2.117	1.446	0.21	0.743	1.286	0.932	1.159	1.073	1.974	0.16	0.409
22	1.12	0.737	1.694	1.261	0.151	1.262	0.86	1.744	0.22	0.405	1.113	0.315	2.251	0.65	1.051
23	0.745	1.874	2.158	0.163	0.199	0.437	0.47	2.51	0.905	1.573	1.661	2.336	0.921	1.11	2.218
24	1.528	1.511	1.739	0.741	1.515	2.115	0.96	0.179	1.089	1.552	2.377	0.668	0.058	1.74	0.161
1	0.857	1.563	2.322	2.305	1.5	1.308	0.31	1.079	1.065	0.167	2.076	0.325	2.308	0.02	0.525
2	0.055	0.076	0.448	1.772	1.806	1.905	0.23	0.296	1.036	0.542	2.246	0.694	2.77	0.31	0.284
3	1.202	0.811	0.725	2.5	1.978	1.143	1.01	1.495	0.939	0.796	0.307	1.422	2.452	0.52	0.955
4	0.274	0.227	0.14	1.285	0.275	0.753	0.3	0.307	2.2	1.364	1.476	1.997	2.665	0.64	0.721
5	0.74	1.33	0.585	0.46	0.612	0.644	0.45	0.228	2.181	2.416	1.124	1.874	1.502	0.22	0.046
6	1.049	0.102	0.562	0.157	0.391	0.261	0.36	0.407	1.34	0.919	0.423	2.093	0.165	0.54	0.519
7	0.239	1.182	1.785	1.134	1.133	0.122	0.66	0.954	0.117	0.617	0.025	0.46	1.295	0.9	0.06
8	0.665	0.644	0.573	0.122	0.33	0.196	0.369	0.466	0.366	0.121	1.31	0.709	0.837	0.256	1.141
9	0.305	0.271	0.167	0.666	0.121	0.496	0.981	1.075	1.494	1.331	1.476	0.427	0.661	1.226	0.568
10	0.548	0.881	0.681	0.569	1.45	1.07	0.441	0.565	0.803	1.191	1.078	0.866	1.335	0.05	1.022
11	0.359	0.847	0.29	0.26	0.32	0.151	1.158	1.527	1.325	0.798	0.775	0.313	0.583	0.818	0.139
12	0.043	0.177	0.971	1.202	0.32	0.091	1.25	1.872	0.469	1.131	1.237	0.08	1.395	0.128	0.121
13	0.525	0.291	0.224	0.216	0.227	0.47	0.681	1.47	0.529	1.139	1.14	0.726	0.531	0.956	0.442
14	0.494	0.136	0.685	0.313	0.443	0.154	0.533	0.32	1.064	0.33	1.47	0.226	0.592	0.587	0.823
15	0.238	1.126	0.275	0.906	0.469	0.388	1.513	2.346	0.515	1.183	2.043	0.26	0.785	0.238	0.15
16	0.309	0.27	0.219	0.672	0.241	0.244	2.469	2.255	1.328	0.578	1.691	0.324	0.823	1.388	0.56
17	1.544	0.461	0.768	1.596	0.681	0.899	0.556	2.367	1.215	0.933	1.341	0.855	0.975	0.729	0.657
18	0.583	0.509	0.703	0.53	1.171	0.951	0.282	0.144	0.779	1.507	1.053	0.737	1.686	1.006	0.157
19	1.264	1.028	1.171	1.39	1.489	0.659	0.14	0.352	1.194	2.198	0.577	1.497	2.046	2.472	1.698
20	0.965	1.372	0.767	2.128	0.771	1.404	1.117	1.362	0.252	0.973	0.813	1.131	2.302	2.147	1.444
21	1.043	0.55	1.055	1.176	1.688	1.215	0.16	1.97	0.33	0.733	0.791	1.044	1.95	1.632	0.664
22	0.676	1.755	1.989	0.662	0.382	0.615	0.65	2.824	0.281	0.376	0.947	1.446	1.559	1.379	1.913
23	1.243	1.361	1.786	1.694	0.667	0.339	1.105	1.427	0.645	0.493	1.08	1.669	2.132	0.991	1.451
24	1.229	1.965	0.732	2.351	0.602	1.799	1.737	0.434	0.026	0.427	0.671	0.236	2.315	0.156	0.825
1	0.502	1.9	1.414	1.042	1.322	1.342	0.015	0.746	0.787	0.443	0.923	0.512	2.599	1.438	0.014
2	1.093	1.003	2.199	1.254	1.158	1.638	0.314	0.176	0.354	0.696	0.156	0.54	1.549	1.618	0.076
3	0.262	0.217	0.824	2.651	2.009	1.941	0.519	1.411	0.098	0.39	0.549	1.823	0.553	0.321	1.763
4	0.333	1.251	0.457	2.583	1.627	0.739	0.637	0.481	0.179	0.337	0.273	1.405	0.236	0.721	0.584
5	0.841	1.417	0.416	1.91	0.715	0.642	0.219	0.203	0.866	0.808	0.687	1.773	2.372	0.267	1.667
6	0.877	0.387	0.534	1.321	0.303	0.308	0.538	0.354	1.838	0.055	0.462	2.101	2.837	1.617	2.185
7	0.671	0.638	1.483	0.208	0.664	0.516	0.897	1.377	0.472	0.939	0.41	1.065	0.578	0.182	0.076
8	0.522	0.758	1.046	0.717	0.46	0.12	0.256	0.26	1.06	0.789	1.184	0.167	0.283	0.141	0.034
