# Supplementary material for: Estrogen receptor alpha in the brain mediates tamoxifen-induced changes in physiology in mice
Source: eLife. 2021 Mar 1;10:e63333. doi: 10.7554/eLife.63333 (PMC7924955; doi:10.7554/eLife.63333)
Supplement: Figure 6—source data 7. — Average movement in light, dark, and 24 hr periods over 2 days before and 3 weeks after injections of oil or tamoxifen in Esr1 cKO female mice. Each column is an independent mouse. [file elife-63333-fig6-data7.xlsx]

## Sheet: Sheet1
Source data for Figure 6, panel h. Average movement in light, dark, and 24 h periods over 2 days before and 3 weeks after injections of oil or tamoxifen in Esr1 cKO female mice. Each column is an independent mouse.
	cKO_Oil								cKO_Tmx
Light	7.79	6.01	6.75	6.21	5.73	5.73	7.28	6.64	5.36	5.83	6.55	6.49	5.91	6.3	6.16	10
Dark	11.9	13.7	14.57	16.66	15.3	12.8	11.16	12.64	14.75	11.61	15.05	17	16.78	18.34	13.6	20.2
24h	19.69	19.71	21.31	22.87	21.04	18.48	18.45	19.29	20.11	17.45	21.6	23.49	22.69	24.64	19.77	30.25
