# Supplementary material for: Estrogen receptor alpha in the brain mediates tamoxifen-induced changes in physiology in mice
Source: eLife. 2021 Mar 1;10:e63333. doi: 10.7554/eLife.63333 (PMC7924955; doi:10.7554/eLife.63333)
Supplement: Supplementary file 1. — (a) Gene set enrichment analysis (GSEA) of estrogen responsive genes in cells from tamoxifen-treated vs. vehicle-treated wild-type mice. (b) List of all gene sets queried in GSEAs for (c, d, and e). (c) Pathways significantly altered in cell clusters from tamoxifen-treated vs. vehicle-treated wild-type mice. (d) Pathways significantly altered in neuronal subtypes from tamoxifen-treated vs. vehicle treated wild-type mice. (e) Pathways significantly altered in cells from tamoxifen-treated vs. vehicle-treated Esr1 cKO mice, as determined by GSEA. (f) GSEA of estrogen responsive genes in cells from tamoxifen-treated vs. vehicle-treated Esr1 cKO mice. (g) GSEA of estrogen responsive genes in neuronal clusters from tamoxifen-treated vs. vehicle-treated wild-type mice. (h) GSEA of estrogen responsive genes in neuronal clusters from tamoxifen-treated vs. vehicle-treated Esr1 cKO mice. (i) Differentially expressed genes (DEGs) in neurons from tamoxifen-treated vs. vehicle-treated mice. (j) DEGs in ependymal cells from tamoxifen-treated vs. vehicle-treated mice. [file elife-63333-supp1.xlsx]

## Sheet: File 1a - GSEA E2 in WT cells
Supplementary File 1a. Gene set enrichment analysis (GSEA) of estrogen responsive genes (GO_RESPONSE_TO_ESTROGEN) in cells from tamoxifen-treated vs. vehicle-treated wild-type mice
Benjamini-Hochburg (BH) procedure was used to adjust p-values for multiple comparisons
A positive enrichment score indicates that tamoxifen administration upregulates genes found in the gene set "GO_RESPONSE_TO_ESTROGEN."
nMoreExtreme represents the number of times a random gene set had a more extreme enrichment score. Lower = stronger enrichment than would be expected by chance
Size of the gene set represents the number of genes from the gene set present in the queried comparative expression data
cluster	pathway	p value	BH adjusted p value*	enrichment score	normalized enrichment score	nMoreExtreme	size of the gene set
Astro	GO_RESPONSE_TO_ESTROGEN	0.424645	0.424645	0.234894	1.02257	3228	128
Oligo	GO_RESPONSE_TO_ESTROGEN	0.411375	0.411375	-0.211663	-1.01515	1366	123
Neuron	GO_RESPONSE_TO_ESTROGEN	0.000652103	0.000652103	-0.332585	-1.62584	1	146
Endo	GO_RESPONSE_TO_ESTROGEN	0.00136799	0.00136799	-0.319318	-1.56651	3	151
Microglia	GO_RESPONSE_TO_ESTROGEN	0.418367	0.418367	-0.208278	-1.01341	901	143
Polydendro	GO_RESPONSE_TO_ESTROGEN	0.265227	0.265227	-0.226319	-1.08312	1092	156
Ependymal	GO_RESPONSE_TO_ESTROGEN	0.0635135	0.0635135	-0.259633	-1.23504	93	157
Mural	GO_RESPONSE_TO_ESTROGEN	0.514294	0.514294	-0.201874	-0.978889	1726	151
Fibro	GO_RESPONSE_TO_ESTROGEN	0.0320487	0.0320487	0.299826	1.34467	157	169
			*only one pathway tested

## Sheet: File 1b - GSEA pathways
Supplementary File 1b. List of all gene sets queried in GSEAs for Supplementary Files 1c, 1d, and 1e
HALLMARK_TNFA_SIGNALING_VIA_NFKB
HALLMARK_HYPOXIA
HALLMARK_CHOLESTEROL_HOMEOSTASIS
HALLMARK_WNT_BETA_CATENIN_SIGNALING
HALLMARK_TGF_BETA_SIGNALING
HALLMARK_IL6_JAK_STAT3_SIGNALING
HALLMARK_APOPTOSIS
HALLMARK_NOTCH_SIGNALING
HALLMARK_ANDROGEN_RESPONSE
HALLMARK_PROTEIN_SECRETION
HALLMARK_INTERFERON_ALPHA_RESPONSE
HALLMARK_INTERFERON_GAMMA_RESPONSE
HALLMARK_HEDGEHOG_SIGNALING
HALLMARK_PI3K_AKT_MTOR_SIGNALING
HALLMARK_MTORC1_SIGNALING
HALLMARK_E2F_TARGETS
HALLMARK_MYC_TARGETS_V1
HALLMARK_MYC_TARGETS_V2
HALLMARK_INFLAMMATORY_RESPONSE
HALLMARK_FATTY_ACID_METABOLISM
HALLMARK_OXIDATIVE_PHOSPHORYLATION
HALLMARK_GLYCOLYSIS
HALLMARK_REACTIVE_OXIGEN_SPECIES_PATHWAY
HALLMARK_P53_PATHWAY
HALLMARK_ANGIOGENESIS
HALLMARK_IL2_STAT5_SIGNALING
HALLMARK_PEROXISOME
HALLMARK_KRAS_SIGNALING_UP
HALLMARK_KRAS_SIGNALING_DN
HALLMARK_ESTROGEN_RESPONSE
GO_NEUROPEPTIDE_SIGNALING_PATHWAY
GO_NEURON_APOPTOTIC_PROCESS
GO_NEURON_DEVELOPMENT
GO_NEUROTRANSMITTER_TRANSPORT
GO_REGULATION_OF_NEURON_DIFFERENTIATION
GO_ASTROCYTE_DIFFERENTIATION
GO_OLIGODENDROCYTE_DIFFERENTIATION
GO_ESTABLISHMENT_OF_ENDOTHELIAL_BARRIER
GO_ENDOTHELIAL_CELL_PROLIFERATION
GO_FIBROBLAST_PROLIFERATION

## Sheet: File 1c - GSEA WT cells
Supplementary File 1c. Pathways significantly altered in cell clusters from tamoxifen-treated vs. vehicle-treated wild-type mice, as determined by gene set enrichment analysis (GSEA)
Benjamini-Hochburg (BH) procedure was used to adjust p-values for multiple GSEAs using all pathways listed in Table 2; only significant gene sets (BH-adjusted p<0.05) shown in this table
A positive enrichment score indicates that tamoxifen administration upregulates genes found in the gene set listed under "pathway."
nMoreExtreme represents the number of times a random gene set had a more extreme enrichment score. Lower = stronger enrichment than would be expected by chance
Size of the gene set represents the number of genes from the gene set present in the queried comparative expression data
cluster	pathway	p value	BH adjusted p value	enrichment score	normalized enrichment score	nMoreExtreme	size of the gene set
Astro	HALLMARK_MYC_TARGETS_V1	0.000478011	0.00773349	-0.436852	-2.30477	0	173
Astro	HALLMARK_MYC_TARGETS_V2	0.000594884	0.00773349	-0.514424	-2.04977	1	40
Astro	HALLMARK_TNFA_SIGNALING_VIA_NFKB	0.000417711	0.00773349	-0.360382	-1.82064	0	130
Astro	HALLMARK_HYPOXIA	0.00127389	0.00883552	-0.317552	-1.61004	2	134
Astro	GO_OLIGODENDROCYTE_DIFFERENTIATION	0.00670017	0.0290341	-0.349167	-1.58192	19	72
Astro	HALLMARK_MTORC1_SIGNALING	0.00135931	0.00883552	-0.304718	-1.57578	2	153
Astro	HALLMARK_INTERFERON_ALPHA_RESPONSE	0.0163009	0.0489028	-0.360763	-1.53216	51	53
Astro	HALLMARK_P53_PATHWAY	0.00390286	0.0217445	-0.297463	-1.52064	8	141
Astro	GO_CENTRAL_NERVOUS_SYSTEM_NEURON_DIFFERENTIATION	0.0116747	0.0413922	-0.291916	-1.44962	28	116
Astro	HALLMARK_E2F_TARGETS	0.01127	0.0413922	-0.281982	-1.43746	25	139
Astro	HALLMARK_GLYCOLYSIS	0.0139983	0.0454943	-0.275345	-1.40702	31	142
Astro	GO_REGULATION_OF_NEURON_DIFFERENTIATION	0.000995135	0.00883552	0.287426	1.43257	8	466
Astro	GO_NEUROTRANSMITTER_TRANSPORT	0.0060461	0.0290341	0.330561	1.50422	47	178
Endo	GO_ESTABLISHMENT_OF_ENDOTHELIAL_BARRIER	0.00100376	0.00782936	-0.540834	-1.98323	3	33
Endo	HALLMARK_MYC_TARGETS_V1	0.000354736	0.00676848	-0.371739	-1.86632	0	175
Endo	HALLMARK_INTERFERON_ALPHA_RESPONSE	0.000571592	0.00676848	-0.423055	-1.85084	1	75
Endo	HALLMARK_TNFA_SIGNALING_VIA_NFKB	0.000666223	0.00676848	-0.327673	-1.60631	1	149
Endo	HALLMARK_P53_PATHWAY	0.000694203	0.00676848	-0.320761	-1.5999	1	167
Endo	HALLMARK_OXIDATIVE_PHOSPHORYLATION	0.00138841	0.00902464	-0.306187	-1.52721	3	167
Endo	GO_NEURON_APOPTOTIC_PROCESS	0.00208261	0.0116031	-0.302166	-1.50716	5	167
Endo	HALLMARK_APOPTOSIS	0.00694225	0.0300831	-0.316299	-1.50058	21	120
Endo	GO_REGULATION_OF_NEURON_DIFFERENTIATION	0.0090123	0.035148	0.263856	1.32896	73	480
Endo	GO_NEUROTRANSMITTER_TRANSPORT	0.00525879	0.0256366	0.322825	1.48423	37	192
Ependymal	HALLMARK_MYC_TARGETS_V1	0.00065189	0.00412864	-0.528688	-2.53473	0	173
Ependymal	HALLMARK_OXIDATIVE_PHOSPHORYLATION	0.00065189	0.00412864	-0.440499	-2.11192	0	173
Ependymal	HALLMARK_MTORC1_SIGNALING	0.000637755	0.00412864	-0.431669	-2.0588	0	166
Ependymal	HALLMARK_TNFA_SIGNALING_VIA_NFKB	0.000632511	0.00412864	-0.428747	-2.03548	0	161
Ependymal	HALLMARK_HYPOXIA	0.000611621	0.00412864	-0.383826	-1.82003	0	155
Ependymal	HALLMARK_FATTY_ACID_METABOLISM	0.000517866	0.00412864	-0.35037	-1.61726	0	128
Fibro	HALLMARK_INTERFERON_GAMMA_RESPONSE	0.000198295	0.0075352	-0.381947	-1.70589	0	155
Microglia	HALLMARK_MYC_TARGETS_V1	0.00053135	0.00474568	-0.458043	-2.3172	0	183
Microglia	HALLMARK_TNFA_SIGNALING_VIA_NFKB	0.000493097	0.00474568	-0.462756	-2.30369	0	161
Microglia	HALLMARK_APOPTOSIS	0.000441501	0.00474568	-0.459212	-2.20244	0	126
Microglia	HALLMARK_P53_PATHWAY	0.000493097	0.00474568	-0.396551	-1.97411	0	161
Microglia	HALLMARK_HYPOXIA	0.001396	0.00907399	-0.349059	-1.7049	2	141
Microglia	HALLMARK_MYC_TARGETS_V2	0.0109713	0.0388982	-0.412437	-1.63535	33	47
Microglia	HALLMARK_INTERFERON_GAMMA_RESPONSE	0.00243309	0.0118613	-0.325415	-1.60659	4	154
Microglia	HALLMARK_IL6_JAK_STAT3_SIGNALING	0.00796675	0.0310703	-0.377908	-1.60119	22	63
Microglia	HALLMARK_INTERFERON_ALPHA_RESPONSE	0.0122722	0.0398847	-0.348001	-1.53063	32	78
Microglia	GO_REGULATION_OF_NEURON_DIFFERENTIATION	0.00238689	0.0118613	0.292499	1.38809	21	485
Microglia	HALLMARK_ANDROGEN_RESPONSE	0.00476126	0.0206321	0.419758	1.63128	34	81
Microglia	GO_NEUROTRANSMITTER_TRANSPORT	0.000608421	0.00474568	0.376305	1.64987	4	193
Neuron	GO_NEUROPEPTIDE_SIGNALING_PATHWAY	0.000551572	0.00717044	-0.474178	-2.00576	1	66
Neuron	HALLMARK_OXIDATIVE_PHOSPHORYLATION	0.000342936	0.00668724	-0.359721	-1.78596	0	167
Neuron	HALLMARK_GLYCOLYSIS	0.000329272	0.00668724	-0.345808	-1.68309	0	144
Neuron	HALLMARK_MYC_TARGETS_V1	0.00510031	0.049728	-0.301979	-1.49588	14	163
Oligo	HALLMARK_MYC_TARGETS_V1	0.000330907	0.0129054	-0.397371	-1.98419	0	166
Polydendro	HALLMARK_TNFA_SIGNALING_VIA_NFKB	0.000242072	0.00919874	-0.370715	-1.76913	0	152
Polydendro	HALLMARK_MYC_TARGETS_V2	0.00290308	0.0429067	-0.441469	-1.73391	12	50
Polydendro	HALLMARK_P53_PATHWAY	0.00338737	0.0429067	-0.307413	-1.48565	13	165

## Sheet: File 1d - GSEA WT neurons
Supplementary File 1d. Pathways significantly altered in neuronal subtypes from tamoxifen-treated vs. vehicle treated wild-type mice, as determined by gene set enrichment analysis (GSEA)
Benjamini-Hochburg (BH) procedure was used to adjust p-values for multiple GSEAs using all pathways listed in Table 2; only significant gene sets (BH-adjusted p<0.05) shown in this table
A positive enrichment score indicates that tamoxifen administration upregulates genes found in the gene set listed under "pathway."
nMoreExtreme represents the number of times a random gene set had a more extreme enrichment score. Lower = stronger enrichment than would be expected by chance
Size of the gene set represents the number of genes from the gene set present in the queried comparative expression data
neuronal cluster	pathway	p value	BH adjusted p value	enrichment score	normalized enrichment score	nMoreExtreme	size of the gene set
Lingo2	HALLMARK_MYC_TARGETS_V1	0.000177	0.006912	0.360635	1.8124	0	172
Lingo2	HALLMARK_OXIDATIVE_PHOSPHORYLATION	0.001241	0.024206	0.318344	1.59386	6	168
Cdk8	HALLMARK_OXIDATIVE_PHOSPHORYLATION	0.000559	0.021792	0.316057	1.73766	2	170
Gad2	HALLMARK_OXIDATIVE_PHOSPHORYLATION	0.000975	0.038012	0.33419	1.62023	4	175
Pomc	HALLMARK_OXIDATIVE_PHOSPHORYLATION	0.000203	0.007928	0.393632	1.92783	0	176
Pomc	GO_NEUROPEPTIDE_SIGNALING_PATHWAY	0.002605	0.033861	0.447875	1.80487	12	57
Pomc	GO_REGULATION_OF_NEURON_DIFFERENTIATION	0.001163	0.022674	-0.2574	-1.40708	5	484
Sst	HALLMARK_HEDGEHOG_SIGNALING	0.001034	0.040339	-0.52469	-1.86194	4	32
Gal	GO_NEUROPEPTIDE_SIGNALING_PATHWAY	0.000536	0.020383	0.517776	1.96138	2	61
Gad2.1	HALLMARK_TNFA_SIGNALING_VIA_NFKB	0.000232	0.004525	-0.38799	-1.7721	0	127
Gad2.1	HALLMARK_OXIDATIVE_PHOSPHORYLATION	0.000176	0.004525	0.387502	1.803	0	175
Crym	HALLMARK_APOPTOSIS	0.000196	0.00392	0.457986	2.00066	0	95
Crym	HALLMARK_OXIDATIVE_PHOSPHORYLATION	0.000201	0.00392	0.383997	1.8481	0	175
Ppp1r17	HALLMARK_TNFA_SIGNALING_VIA_NFKB	0.000821	0.021047	-0.36882	-1.71387	2	125
Ppp1r17	HALLMARK_APOPTOSIS	0.001079	0.021047	-0.36257	-1.64585	3	109
Foxb1	HALLMARK_OXIDATIVE_PHOSPHORYLATION	0.000199	0.007775	-0.40188	-1.87923	0	179
Foxb1	GO_NEUROTRANSMITTER_TRANSPORT	0.001596	0.031132	0.326165	1.55441	7	211
Oxt	HALLMARK_OXIDATIVE_PHOSPHORYLATION	0.000749	0.020613	0.398549	1.52953	3	180
Oxt	HALLMARK_GLYCOLYSIS	0.003414	0.044388	-0.40385	-1.50383	15	148
Oxt	GO_REGULATION_OF_NEURON_DIFFERENTIATION	0.001057	0.020613	-0.32668	-1.37098	4	491
Tac2	HALLMARK_MYC_TARGETS_V1	0.000464	0.017989	0.341594	1.61107	1	180
Tac2	HALLMARK_OXIDATIVE_PHOSPHORYLATION	0.000923	0.017989	0.335852	1.5838	3	179
Tac2	GO_NEURON_APOPTOTIC_PROCESS	0.004558	0.046673	0.320998	1.47937	19	153
Tac2	GO_REGULATION_OF_NEURON_DIFFERENTIATION	0.004787	0.046673	-0.27404	-1.36408	29	442
Plp1	HALLMARK_ANDROGEN_RESPONSE	0.001138	0.044369	0.427891	1.67862	5	80
Hdc	HALLMARK_HEDGEHOG_SIGNALING	0.002042	0.039828	0.534279	1.87255	9	26
Hdc	HALLMARK_MTORC1_SIGNALING	0.000392	0.0153	0.355102	1.77499	1	150

## Sheet: File 1e - GSEA in cKO cells
Supplementary File 1e. Pathways significantly altered in cells from tamoxifen-treated vs. vehicle-treated Esr1 cKO mice, as determined by gene set enrichment analysis (GSEA)
Benjamini-Hochburg (BH) procedure was used to adjust p-values for multiple GSEAs using all pathways listed in Table 2; only significant gene sets (BH-adjusted p<0.05) shown in this table
A positive enrichment score indicates that tamoxifen administration upregulates genes found in the gene set listed under "pathway."
nMoreExtreme represents the number of times a random gene set had a more extreme enrichment score. Lower = stronger enrichment than would be expected by chance
Size of the gene set represents the number of genes from the gene set present in the queried comparative expression data
cluster	pathway	p value	BH adjusted p value	enrichment score	normalized enrichment score	nMoreExtreme	size of the gene set
Astro	HALLMARK_OXIDATIVE_PHOSPHORYLATION	0.000487567	0.0190151	0.330578	1.75995	0	171
Endo	GO_REGULATION_OF_NEURON_DIFFERENTIATION	0.000228754	0.00404397	-0.314756	-1.55583	1	469
Endo	HALLMARK_MTORC1_SIGNALING	0.00611995	0.0397797	0.292941	1.48151	14	169
Endo	HALLMARK_INTERFERON_GAMMA_RESPONSE	0.000772499	0.00602549	0.340854	1.69126	1	146
Endo	HALLMARK_OXIDATIVE_PHOSPHORYLATION	0.000414766	0.00404397	0.409208	2.07393	0	173
Endo	HALLMARK_INTERFERON_ALPHA_RESPONSE	0.000324359	0.00404397	0.470886	2.10006	0	80
Endo	HALLMARK_MYC_TARGETS_V1	0.000412371	0.00404397	0.431097	2.19324	0	176
Ependymal	GO_NEUROTRANSMITTER_TRANSPORT	0.0014918	0.0283441	-0.359886	-1.52836	11	204
Ependymal	HALLMARK_MYC_TARGETS_V1	0.000473709	0.0180009	0.36717	1.74147	0	174
Fibro	GO_NEUROTRANSMITTER_TRANSPORT	0.00128164	0.0243512	-0.33911	-1.53983	7	214
Fibro	HALLMARK_OXIDATIVE_PHOSPHORYLATION	0.000775795	0.0243512	0.34029	1.59531	2	181
Microglia	HALLMARK_TNFA_SIGNALING_VIA_NFKB	0.000190512	0.00407779	-0.458848	-2.12829	0	159
Microglia	HALLMARK_ANDROGEN_RESPONSE	0.000586854	0.00762911	-0.443098	-1.82595	2	78
Microglia	HALLMARK_TGF_BETA_SIGNALING	0.00575511	0.0453307	-0.452274	-1.69532	28	49
Microglia	HALLMARK_ANGIOGENESIS	0.00581162	0.0453307	0.602037	1.96486	28	26
Microglia	HALLMARK_OXIDATIVE_PHOSPHORYLATION	0.000209118	0.00407779	0.461402	2.16793	0	172
Mural	HALLMARK_MTORC1_SIGNALING	0.000595948	0.00754867	0.339866	1.62576	1	184
Mural	HALLMARK_OXIDATIVE_PHOSPHORYLATION	0.00029994	0.00569886	0.380714	1.81206	0	180
Mural	HALLMARK_MYC_TARGETS_V1	0.00029753	0.00569886	0.397916	1.90155	0	183
Neuron	GO_NEUROTRANSMITTER_TRANSPORT	0.000154967	0.00175108	-0.410905	-1.87771	0	204
Neuron	GO_REGULATION_OF_NEURON_DIFFERENTIATION	0.000139392	0.00175108	-0.319266	-1.59017	0	486
Neuron	HALLMARK_KRAS_SIGNALING_DN	0.0114826	0.0447822	-0.366792	-1.50753	67	99
Neuron	HALLMARK_E2F_TARGETS	0.0101246	0.0438733	0.316599	1.45289	38	131
Neuron	HALLMARK_GLYCOLYSIS	0.0015528	0.00865129	0.350588	1.62214	5	137
Neuron	HALLMARK_REACTIVE_OXIGEN_SPECIES_PATHWAY	0.00781424	0.0380944	0.470663	1.69344	34	36
Neuron	HALLMARK_MTORC1_SIGNALING	0.000261506	0.00175108	0.389831	1.82143	0	147
Neuron	HALLMARK_FATTY_ACID_METABOLISM	0.000246124	0.00175108	0.44142	1.94091	0	100
Neuron	HALLMARK_MYC_TARGETS_V1	0.000268601	0.00175108	0.556183	2.65739	0	169
Neuron	HALLMARK_OXIDATIVE_PHOSPHORYLATION	0.000269397	0.00175108	0.740645	3.53755	0	170
Oligo	HALLMARK_KRAS_SIGNALING_DN	0.00555115	0.0306456	-0.403712	-1.64645	34	82
Oligo	HALLMARK_TNFA_SIGNALING_VIA_NFKB	0.0036872	0.0287602	-0.377306	-1.63136	23	115
Oligo	HALLMARK_CHOLESTEROL_HOMEOSTASIS	0.005386	0.0306456	0.425522	1.7111	20	51
Oligo	GO_NEUROPEPTIDE_SIGNALING_PATHWAY	0.00628627	0.0306456	0.480823	1.76048	25	34
Oligo	GO_OLIGODENDROCYTE_DIFFERENTIATION	0.00157068	0.0153141	0.443373	1.87596	5	65
Oligo	HALLMARK_MTORC1_SIGNALING	0.000303122	0.0040625	0.385271	1.87929	0	153
Oligo	HALLMARK_MYC_TARGETS_V1	0.000308642	0.0040625	0.404991	2.01187	0	167
Oligo	HALLMARK_OXIDATIVE_PHOSPHORYLATION	0.0003125	0.0040625	0.535567	2.66944	0	172
Polydendro	HALLMARK_GLYCOLYSIS	0.0026732	0.0253954	0.330264	1.53419	11	150
Polydendro	HALLMARK_FATTY_ACID_METABOLISM	0.000654308	0.0082879	0.377203	1.69262	2	119
Polydendro	HALLMARK_MYC_TARGETS_V1	0.000228415	0.00433988	0.451374	2.14015	0	180
Polydendro	HALLMARK_OXIDATIVE_PHOSPHORYLATION	0.000226706	0.00433988	0.59386	2.81247	0	177

## Sheet: File 1f - GSEA E2 in cKO cells
Supplementary File 1f. Gene set enrichment analysis (GSEA) of estrogen responsive genes (GO_RESPONSE_TO_ESTROGEN) in cells from tamoxifen-treated vs. vehicle-treated Esr1 cKO mice
Benjamini-Hochburg (BH) procedure was used to adjust p-values for multiple comparisons
A positive enrichment score indicates that tamoxifen administration upregulates genes found in the gene set "GO_RESPONSE_TO_ESTROGEN."
nMoreExtreme represents the number of times a random gene set had a more extreme enrichment score. Lower = stronger enrichment than would be expected by chance
Size of the gene set represents the number of genes from the gene set present in the queried comparative expression data
cluster	pathway	p value	BH adjusted p value*	enrichment score	normalized enrichment score	nMoreExtreme	size of the gene set
Astro	GO_RESPONSE_TO_ESTROGEN	0.242468	0.242468	0.300944	1.1549	836	32
Oligo	GO_RESPONSE_TO_ESTROGEN	0.309785	0.309785	0.304997	1.10573	1297	33
Neuron	GO_RESPONSE_TO_ESTROGEN	0.637939	0.637939	0.241183	0.895074	2797	41
Endo	GO_RESPONSE_TO_ESTROGEN	0.1669	0.1669	0.306243	1.21438	594	44
Microglia	GO_RESPONSE_TO_ESTROGEN	0.769121	0.769121	0.219005	0.809359	3780	44
Polydendro	GO_RESPONSE_TO_ESTROGEN	0.238658	0.238658	0.302394	1.14566	1130	48
Ependymal	GO_RESPONSE_TO_ESTROGEN	0.964863	0.964863	0.172994	0.669781	3102	53
Mural	GO_RESPONSE_TO_ESTROGEN	0.263426	0.263426	0.292324	1.12283	1083	51
Fibro	GO_RESPONSE_TO_ESTROGEN	0.105014	0.105014	-0.352868	-1.29719	598	54
			*only one pathway tested

## Sheet: File 1g - GSEA E2 WT neurons
Supplementary File 1g. Gene set enrichment analysis (GSEA) of estrogen responsive genes (GO_RESPONSE_TO_ESTROGEN) in neuronal clusters from tamoxifen-treated vs. vehicle-treated wild-type mice
Benjamini-Hochburg (BH) procedure was used to adjust p-values for multiple comparisons
A positive enrichment score indicates that tamoxifen administration upregulates genes found in the gene set "GO_RESPONSE_TO_ESTROGEN."
nMoreExtreme represents the number of times a random gene set had a more extreme enrichment score. Lower = stronger enrichment than would be expected by chance
Size of the gene set represents the number of genes from the gene set present in the queried comparative expression data
neuronal cluster	pathway	p value	BH adjusted p value*	enrichment score	normalized enrichment score	nMoreExtreme	size of the gene set
Lingo2	GO_RESPONSE_TO_ESTROGEN	0.748301	0.748301	0.188136	0.861802	4072	97
Cdk8	GO_RESPONSE_TO_ESTROGEN	0.413289	0.413289	-0.202991	-1.02032	1977	95
Gad2	GO_RESPONSE_TO_ESTROGEN	0.677226	0.677226	0.196537	0.909233	3505	132
Nnat	GO_RESPONSE_TO_ESTROGEN	0.784745	0.784745	-0.176531	-0.859347	2427	99
Pomc	GO_RESPONSE_TO_ESTROGEN	0.000395883	0.000395883	-0.361301	-1.6924	1	134
Sst	GO_RESPONSE_TO_ESTROGEN	0.848014	0.848014	-0.17777	-0.835604	3927	136
Vgf	GO_RESPONSE_TO_ESTROGEN	0.140287	0.140287	-0.255635	-1.22086	498	73
Gal	GO_RESPONSE_TO_ESTROGEN	0.0989196	0.0989196	-0.2664	-1.21743	411	143
Gad2.1	GO_RESPONSE_TO_ESTROGEN	0.987473	0.987473	-0.150212	-0.690936	4177	131
Crym	GO_RESPONSE_TO_ESTROGEN	0.328883	0.328883	0.231455	1.05834	1674	123
Ppp1r17	GO_RESPONSE_TO_ESTROGEN	0.140464	0.140464	-0.24924	-1.17108	502	133
Tcf7l2	GO_RESPONSE_TO_ESTROGEN	0.0685756	0.0685756	-0.313596	-1.28057	375	100
Apoe	GO_RESPONSE_TO_ESTROGEN	0.107085	0.107085	-0.278873	-1.18756	463	150
Foxb1	GO_RESPONSE_TO_ESTROGEN	0.839444	0.839444	0.186361	0.848038	4166	147
Gm5741	GO_RESPONSE_TO_ESTROGEN	0.00232618	0.00232618	-0.40077	-1.5846	8	135
Oxt	GO_RESPONSE_TO_ESTROGEN	0.0126447	0.0126447	-0.384626	-1.41568	58	134
Tac2	GO_RESPONSE_TO_ESTROGEN	0.57099	0.57099	0.21921	0.953398	2605	106
Plp1	GO_RESPONSE_TO_ESTROGEN	0.160009	0.160009	-0.270735	-1.15784	744	128
Cntn5	GO_RESPONSE_TO_ESTROGEN	0.0400938	0.0400938	-0.292461	-1.37554	187	91
Npy	GO_RESPONSE_TO_ESTROGEN	0.661511	0.661511	0.205764	0.900479	4105	95
Slc6a3	GO_RESPONSE_TO_ESTROGEN	0.36203	0.36203	0.229126	1.0539	1904	50
Vip	GO_RESPONSE_TO_ESTROGEN	0.560749	0.560749	0.199976	0.946448	2902	87
Ndnf	GO_RESPONSE_TO_ESTROGEN	0.6053	0.6053	0.190519	0.919543	2991	68
Hbb-bs	GO_RESPONSE_TO_ESTROGEN	0.706477	0.706477	0.192885	0.881663	2584	67
Hdc	GO_RESPONSE_TO_ESTROGEN	0.597877	0.597877	0.200465	0.925777	3041	94
			*only one pathway tested

## Sheet: File 1h - GSEA E2 cKO neurons
Supplementary File 1h. Gene set enrichment analysis (GSEA) of estrogen responsive genes (GO_RESPONSE_TO_ESTROGEN) in neuronal clusters from tamoxifen-treated vs. vehicle-treated Esr1 cKO mice
Benjamini-Hochburg (BH) procedure was used to adjust p-values for multiple comparisons
A positive enrichment score indicates that tamoxifen administration upregulates genes found in the gene set "GO_RESPONSE_TO_ESTROGEN."
nMoreExtreme represents the number of times a random gene set had a more extreme enrichment score. Lower = stronger enrichment than would be expected by chance
Size of the gene set represents the number of genes from the gene set present in the queried comparative expression data
neuronal cluster	pathway	p value	BH adjusted p value*	enrichment score	normalized enrichment score	nMoreExtreme	size of the gene set
Lingo2	GO_RESPONSE_TO_ESTROGEN	0.748801	0.748801	0.190137	0.853163	4682	95
Cdk8	GO_RESPONSE_TO_ESTROGEN	0.368153	0.368153	0.228938	1.04299	2096	91
Gad2	GO_RESPONSE_TO_ESTROGEN	0.375059	0.375059	0.216497	1.03882	1575	126
Nnat	GO_RESPONSE_TO_ESTROGEN	0.929154	0.929154	-0.170768	-0.737579	6150	98
Pomc	GO_RESPONSE_TO_ESTROGEN	0.698003	0.698003	-0.203319	-0.888574	5033	128
Sst	GO_RESPONSE_TO_ESTROGEN	0.0934923	0.0934923	-0.284705	-1.26221	634	124
Vgf	GO_RESPONSE_TO_ESTROGEN	0.212993	0.212993	-0.230098	-1.12415	776	104
Gal	GO_RESPONSE_TO_ESTROGEN	0.0538751	0.0538751	-0.300113	-1.32199	357	137
Gad2.1	GO_RESPONSE_TO_ESTROGEN	0.914942	0.914942	-0.173183	-0.786045	5259	134
Crym	GO_RESPONSE_TO_ESTROGEN	0.818239	0.818239	-0.200656	-0.84283	5230	132
Ppp1r17	GO_RESPONSE_TO_ESTROGEN	0.891408	0.891408	0.174013	0.823999	3184	134
Tcf7l2	GO_RESPONSE_TO_ESTROGEN	0.93537	0.93537	0.19515	0.790474	4254	123
Apoe	GO_RESPONSE_TO_ESTROGEN	0.108624	0.108624	-0.279689	-1.20017	494	143
Foxb1	GO_RESPONSE_TO_ESTROGEN	0.902947	0.902947	0.18155	0.803997	5330	141
Gm5741	GO_RESPONSE_TO_ESTROGEN	0.0604927	0.0604927	-0.337179	-1.32	387	111
Oxt	GO_RESPONSE_TO_ESTROGEN	0.490653	0.490653	-0.255994	-0.985985	3621	138
Tac2	GO_RESPONSE_TO_ESTROGEN	0.183557	0.183557	-0.277802	-1.15725	1218	139
Plp1	GO_RESPONSE_TO_ESTROGEN	0.497291	0.497291	0.226236	0.98044	2569	112
Cntn5	GO_RESPONSE_TO_ESTROGEN	0.400446	0.400446	0.219601	1.03284	2511	80
Npy	GO_RESPONSE_TO_ESTROGEN	0.2042	0.2042	-0.280217	-1.14156	1234	121
Slc6a3	GO_RESPONSE_TO_ESTROGEN	0.262929	0.262929	-0.223571	-1.13972	1270	47
Vip	GO_RESPONSE_TO_ESTROGEN	0.287755	0.287755	0.23159	1.10227	1369	73
Ndnf	GO_RESPONSE_TO_ESTROGEN	0.239858	0.239858	-0.236191	-1.14892	1146	57
Hbb-bs	GO_RESPONSE_TO_ESTROGEN	0.893645	0.893645	-0.192084	-0.790871	4049	73
Hdc	GO_RESPONSE_TO_ESTROGEN	0.294598	0.294598	0.243365	1.08592	1477	98
			*only one pathway tested

## Sheet: File 1i - DEGs in neurons
Supplementary File 1i. Differentially expressed genes (DEGs) in neurons from tamoxifen-treated vs. vehicle-treated mice
All genes significantly (Bonferroni adj, P < .05) regulated by tamoxifen in wild-type neurons are shown.
Log-fold changes and Bonferroni adjusted P values are given for both wild-type and Esr1cKO neurons
For each genotype, a positive log fold change (logFC) indicates upregulated expression and a negative logFC indicates downregulated expression
	wild-type neurons		Esr1 cKO neurons
gene	avg_logFC	adjusted p value	avg_logFC	adjusted p value
Copg2	0.361299	4.25395e-20	-0.470765	4.3202e-47
Gpr133	0.441616	4.65363e-18	-0.338469	3.68762e-21
Traf5	0.463663	2.83092e-21	-0.271745	3.31411e-20
Psmd13	0.407348	4.09076e-11	-0.321077	3.73804e-16
Rimklb	0.357073	1.05606e-10	-0.349884	9.956e-22
Ipcef1	0.377108	1.21873e-08	-0.30327	9.36916e-17
Tbc1d9	0.295879	4.80657e-11	-0.357483	7.34706e-21
Myo3a	0.371942	3.2058e-52	-0.273964	5.95131e-41
Pou2f3	0.335426	1.10406e-06	-0.271854	1.09489e-15
Ppia	-0.35767	8.71668e-16	0.240317	5.33604e-11
Rrm2b	0.286545	7.51523e-08	-0.310712	2.75087e-14
Nrg3	0.233574	0.00158277	-0.363552	2.84374e-24
Sema5b	0.285345	8.29414e-05	-0.291746	8.01203e-15
Fcrla	0.317806	0.000665883	-0.236812	2.28031e-12
Lrba	0.320427	1.91865e-17	-0.231997	5.33868e-19
Vmp1	0.292115	1.53479e-10	-0.244339	7.9688e-11
Gadl1	0.315554	7.32444e-06	-0.217747	5.11711e-11
Cdc37l1	0.289254	0.0114742	-0.227926	0.064762
Gnaq	0.300695	5.06602e-10	-0.212398	1.20949e-08
Pask	-0.289626	6.29309e-14	0.218658	1.09045e-08
Tcf12	0.356507	0.00116345	-0.149281	1.87799e-06
Spats1	0.257187	0.000198711	-0.242145	1.62125e-14
Lcor	0.261872	1.30093e-08	-0.214956	1.41264e-13
Stmn1	-0.272617	1.93847e-11	0.197946	7.94264e-06
Grm8	0.277376	0.00212543	-0.178415	0.0033735
Lrp1b	0.20329	1.03382e-06	-0.240159	6.02892e-17
Rabgef1	0.278429	0.000600775	-0.137542	0.133899
Zfp839	0.242408	0.0284875	-0.168687	0.60258
Gm20388	0.276754	1.11246e-08	-0.130641	6.8261e-09
Rab39	0.248808	0.0293523	-0.15387	7.26075e-05
Eef2	-0.251395	1.0292e-05	0.130713	0.0150751
Tuba1c	-0.232252	1.73465e-08	0.146437	0.0122307
Cox7c	-0.166275	0.00487062	0.203629	1.16946e-08
Gm10288	-0.2852	3.08705e-16	0.0824688	0.0241586
Pcsk1n	-0.239063	1.76145e-05	0.127721	2.51351e-07
Zc3h13	-0.122443	0.000134091	0.21679	5.07627e-07
Rpl10	-0.170658	0.000690206	0.162404	0.0278776
Tmem179	-0.304326	7.57654e-09	0.0267367	1
Tpr	-0.207628	7.78552e-06	0.121642	0.211717
Prkar1b	-0.214579	1.76021e-06	0.113452	0.00125775
Rif1	-0.29008	3.17226e-09	0.0373091	1
Ndufs5	-0.147893	0.000121667	0.17875	6.37083e-05
Myo7a	0.26561	4.22749e-05	-0.0605252	1
G3bp2	-0.188689	0.00102237	0.135587	0.652448
Gm20594	-0.187539	7.41914e-09	0.134401	0.00391889
Ctsb	-0.258875	8.0751e-06	0.0607936	1
Pkm	-0.208477	9.01329e-05	0.110759	0.837685
Ftl1	-0.186372	1.70691e-05	0.126379	0.069761
Malat1	-0.222553	7.47781e-05	0.0854981	0.000388478
Gm9493	-0.192832	2.49488e-09	0.113843	0.114723
Smarca5	-0.184997	0.000133974	0.113533	1
Gapdh	-0.211094	9.57583e-09	0.0826562	1
Aurkaip1	-0.142776	0.0418264	0.150838	0.00212637
Chgb	-0.231978	0.00117724	0.0512588	1
Cox5a	-0.149928	0.00754088	0.132586	0.0154787
Zic1	0.387337	0.00148826	0.105562	1
Hspa8	-0.229497	4.01632e-07	0.0516375	1
Gabarap	-0.228016	0.00683204	0.0524868	1
Gm7536	-0.210629	2.74793e-06	0.0690604	1
Man1a2	-0.238339	0.0146233	0.0355672	1
Hdac11	-0.122284	0.00162473	0.147372	0.768807
mt-Rnr2	-0.250153	4.76598e-17	0.0193469	1
Vezf1	-0.214899	0.0221686	0.0528693	1
Cct3	-0.180451	0.0276796	0.0870507	1
Gm6133	-0.180783	0.00176623	0.0845709	1
Gcc2	-0.140133	3.38637e-06	0.116127	1
1500016L03Rik	-0.185617	0.00037952	0.0696837	1
Tma7	-0.158432	0.00119465	0.0963944	1
Wdr6	-0.179117	8.75284e-05	0.0648822	1
Map9	-0.169096	0.0119421	0.0739389	1
Faim2	-0.225584	0.003783	0.0168953	1
Cep290	-0.189836	3.61403e-06	0.0480934	1
Kcnab3	-0.119639	0.0353901	0.117579	1
Pam16	-0.167701	0.035383	0.0689895	1
Rpl35	-0.0870353	0.0410635	0.148937	0.0771812
Rbm8a	-0.177526	0.000974784	0.0567802	1
Hmgn2	-0.118037	0.0454848	0.114303	1
Akap9	-0.217269	2.69247e-07	0.01375	1
Rpl22	-0.186195	0.00710141	0.0447059	1
Mfap1a	-0.166258	0.00144966	0.0621501	1
Foxb1	-0.203765	1.00541e-07	0.0210034	1
Prpf4b	-0.141494	0.000626214	0.0821774	1
Gm5160	-0.100297	0.00156894	0.123291	0.144686
Lhx1	-0.208918	1.84265e-05	0.0137394	1
Sec61g	-0.163823	0.0387432	0.0584912	1
Rock2	-0.147143	0.0491389	0.0737366	1
Zfp292	-0.173265	0.00943097	0.0450317	1
Cdkl2	-0.194359	7.76985e-06	0.0220516	1
Dctn2	-0.200495	0.000140299	0.0152853	1
Ewsr1	-0.141027	0.00371797	0.0745594	1
Pbrm1	-0.124815	0.0147224	0.0893345	1
Arid4b	-0.125741	0.0055079	0.0866091	1
Ktn1	-0.186526	4.27941e-05	0.0250458	1
Csnk1g2	-0.191483	1.62636e-05	0.0178391	1
Ncl	-0.17714	0.0016641	0.0285577	1
Ctsa	-0.222645	0.0183667	-0.0174792	1
Cib2	-0.118433	0.0133211	0.0851403	1
Sf3b2	-0.10405	0.0440124	0.0940717	1
Acp1	-0.119802	4.15378e-05	0.0782499	1
Map1b	-0.149093	0.0498102	0.047605	1
Dpysl2	-0.108672	0.00877841	0.0873689	1
Eif3a	-0.126109	0.00153334	0.0666626	1
Hsp90aa1	-0.149571	6.76462e-05	0.0383598	1
Eea1	-0.207121	5.47328e-05	-0.0204563	1
Chd4	-0.168595	0.0112232	0.0180458	1
Cxx1c	-0.117516	0.00656295	0.0687595	1
Ly6e	-0.12081	0.00429771	0.0621588	1
Gsk3a	-0.167318	0.00193332	0.0154715	1
Tmem145	-0.207045	0.000454161	-0.033395	1
Svop	-0.200922	0.000727193	-0.0276204	1
Zfp106	-0.140205	0.0153667	0.0303406	1
Camk2n1	-0.0650611	0.0403344	0.103422	1
Gm26924	-0.260551	0.00445044	-0.0944642	1
Rnf11	-0.123778	0.0261569	0.0403143	1
Gpx4	-0.129877	0.009438	0.0340843	1
Soga3	-0.105755	0.00939463	0.0553459	1
Gaa	-0.277102	5.98168e-10	-0.11858	1
Ccdc88a	-0.181812	3.36024e-05	-0.0249989	1
Bod1l	-0.134297	4.71655e-06	0.01895	1
Ankrd11	-0.163986	6.6799e-06	-0.0120584	1
Psap	-0.225451	2.0683e-05	-0.0735583	1
B230323A14Rik	-0.116446	0.00863939	0.0287814	1
Rpl10a	-0.107124	0.0334743	0.0345722	1
Safb2	-0.0984129	0.0342542	0.0348771	1
Gm10116	-0.106371	0.0050564	0.0256175	1
Vstm2l	-0.185389	0.0165711	-0.0573384	1
Miat	-0.0868462	0.0097324	0.0181667	1
MIMT1-1	-0.0900524	0.000582811	0.0140038	1
Sez6l	-0.276162	0.00447655	-0.173546	1
Nat14	-0.0892829	0.016068	0.0100776	1
B3gat3	-0.138711	0.00162023	-0.0454147	1
Zfml	-0.130395	0.0343563	-0.0406499	1
Tspan7	-0.162155	0.000353832	-0.0756259	1
Clstn1	-0.180079	0.00316994	-0.103993	1
Klhdc3	-0.0388643	0.039553	0.0360808	1
Rusc2	-0.0804763	0.0236034	-0.0183497	1
Trip11	-0.137476	0.00116362	-0.075766	1
Disp2	-0.142073	0.00210109	-0.0871745	1
Trove2	-0.0124075	0.00153421	-0.0603834	1
Rph3a	-0.0978568	0.00579682	-0.0627148	1
Hipk1	-0.0544081	0.0335365	-0.0193487	1
Atrx	-0.210765	2.10184e-08	NA	NA
Pitx2	-0.14492	2.21884e-08	NA	NA
Slc9a6	-0.137152	4.15185e-06	NA	NA
Vegfa	-0.233493	4.65352e-06	NA	NA
Ttr	0.349102	1.53995e-05	NA	NA
Ankrd26	-0.124253	2.12741e-05	NA	NA
Sult4a1	-0.143686	0.00330194	NA	NA
Frs3	-0.0623092	0.0150999	NA	NA
Alkbh8	-0.158884	0.0295285	NA	NA
9530082P21Rik	-0.120876	0.0346341	NA	NA
Peg10	-0.184601	0.0351386	NA	NA
Prkaca	-0.114027	0.0409935	NA	NA

## Sheet: File 1j - DEGs in ependymal
Supplementary File 1j. Differentially expressed genes (DEGs) in ependymal cells from tamoxifen-treated vs. vehicle-treated mice
All genes significantly (Bonferroni adj, P < .05) regulated by tamoxifen in wild-type (WT) ependymal cells are shown.
Log-fold changes and Bonferroni adjusted P values are given for both wild-type and Esr1cKO ependymal cells
For each genotype, a positive average log fold change (avg_logFC) indicates upregulated expression and a negative avg_logFC indicates downregulated expression
	wild-type ependymal cells		Esr1 cKO ependymal cells
gene	avg_logFC	adjusted p value	avg_logFC	adjusted p value
4933405E24Rik	0.937639	3.29897e-44	-0.413907	5.39713e-10
Gpr133	0.796335	5.9634e-26	-0.372119	4.34155e-12
Ssh2	0.752254	1.11638e-33	-0.379438	6.12654e-09
Sema5b	0.51061	1.10783e-05	-0.59208	1.38051e-15
Agbl4	0.656023	1.62645e-16	-0.442393	7.93157e-11
Rrm2b	0.505718	1.03038e-07	-0.574141	2.8106e-16
Myo3a	0.646354	4.93453e-53	-0.39329	1.05895e-18
Rimklb	0.566583	5.5238e-14	-0.468219	1.1249e-11
Gabrg3	0.717082	2.15091e-17	-0.283892	0.00236581
Lrp1b	0.51555	5.46753e-06	-0.476318	1.43848e-10
Magi2	0.56129	2.39217e-09	-0.421982	8.30374e-07
Tbc1d9	0.6488	3.54634e-28	-0.328925	1.01243e-09
Zfpm2	0.542712	1.15931e-08	-0.424568	1.62514e-08
Gm20388	0.582134	8.73713e-19	-0.380934	5.09413e-13
Nedd9	0.548345	6.27604e-05	-0.341484	7.0007e-05
Il1rapl1	0.67541	5.62738e-10	-0.209802	0.0072728
Vmp1	0.46525	6.15517e-10	-0.403253	1.76759e-09
Csmd1	0.497453	6.31696e-09	-0.366349	0.000759343
Mrps28	0.618732	2.87945e-16	-0.241872	0.000387301
A330033J07Rik	0.403882	7.25654e-05	-0.455245	1.86919e-08
Fgfr2	0.452592	1.28123e-05	-0.396928	4.07599e-06
Psmd13	0.458349	0.000577563	-0.389235	4.10603e-08
Efcab11	0.721215	6.15043e-09	-0.125259	1
Gnaq	0.497052	4.03243e-14	-0.348013	1.61926e-10
Gabrb1	0.515623	0.00177399	-0.315437	0.00411268
9530026P05Rik	0.496237	0.00348878	-0.332711	1
Traf5	0.496695	8.02314e-08	-0.325944	2.79238e-10
1700007G11Rik	0.488156	6.58741e-05	-0.334041	0.00152215
Dis3l2	0.413133	0.00648179	-0.406712	6.42352e-08
Hs6st3	0.592242	5.2779e-09	-0.226544	0.00709081
Dync1i1	0.650442	5.49329e-11	-0.167507	1
Ctla4	0.457934	2.95534e-06	-0.350053	8.14143e-06
Cx3cr1	0.620955	1.04895e-12	-0.175797	0.00997585
Nrxn3	0.492465	0.000541201	-0.301518	0.0952231
Lcor	0.404386	2.08432e-07	-0.388362	3.98228e-08
Nos1ap	0.653226	5.03716e-12	-0.134219	0.361455
Ipcef1	0.489102	3.39488e-06	-0.295859	1.01572e-05
2810055G20Rik	0.508759	1.96981e-07	-0.267836	1
Gm11077	0.439676	9.6629e-07	-0.336024	1.37393e-06
Foxn3	0.524685	1.90381e-06	-0.23834	0.0163821
Abr	0.415433	8.59768e-05	-0.342461	1.8616e-05
Gm13481	0.518043	2.79925e-05	-0.2309	1
1300017J02Rik	0.615381	1.47518e-06	-0.133134	1
Tubb4b	-0.455934	6.05818e-07	0.284296	1
Ccser1	0.447359	8.68634e-06	-0.284167	0.00232282
Zfp839	0.51581	0.00249925	-0.212782	0.00329033
Kcnb2	0.380058	0.00178848	-0.341462	0.000792208
Unc5cl	0.431065	0.00152708	-0.288388	1
Kcnip4	0.443854	9.53667e-06	-0.274034	0.00184834
Fhit	0.475076	9.18583e-05	-0.232933	1
Tcf12	0.34937	0.0209583	-0.355211	0.00023533
Cdc37l1	0.432341	0.0336812	-0.264018	0.000312032
Spats1	0.403329	0.00317813	-0.288572	0.04248
mt-Rnr2	-0.338557	3.22443e-23	0.340882	4.02032e-24
Tmem132d	0.488986	1.11043e-07	-0.181624	0.000529288
2410018M08Rik	-0.413034	1.95454e-05	0.257366	1
Hspa5	-0.318316	7.07751e-05	0.347994	1
Anks1b	0.422794	0.00130745	-0.237967	0.00593949
Nlgn1	0.281705	0.000685833	-0.379032	5.91412e-06
Ttll8	0.539889	7.19415e-06	-0.115565	1
Mgat5	0.410876	0.00144572	-0.244569	0.227075
4930529M08Rik	0.504679	0.000708814	-0.145569	1
Trim9	0.493028	8.15468e-05	-0.156542	1
Npas3	0.440495	0.00140054	-0.209007	1
Ccdc162	0.563694	0.00952997	-0.0845334	1
Fras1	0.356894	0.00194914	-0.289771	0.529331
Tiam1	0.399238	0.00440616	-0.241699	1
Rarres2	-0.372298	0.00446861	0.268633	1
Csmd3	0.40965	0.00170064	-0.228626	0.094452
Clybl	0.502102	4.35548e-06	-0.132612	1
Cacnb2	0.426164	0.0132925	-0.205232	0.22472
Ddah1	0.447943	0.000332604	-0.181145	0.00193573
Pdxdc1	0.410219	0.000158444	-0.213485	1
Malat1	-0.338297	2.3746e-33	0.283485	3.12183e-21
Pnpla3	0.457453	0.00541847	-0.160815	1
Rnf144b	0.568826	1.06847e-06	-0.0424368	1
Lrba	0.399973	0.000821088	-0.209894	0.492488
Gm15286	0.438817	4.2164e-06	-0.170561	0.0252836
Gm19301	0.462772	3.64626e-06	-0.144962	0.0137654
Trpm4	0.343352	0.0142034	-0.261123	0.00186713
Gadl1	0.475397	3.56457e-07	-0.127257	5.58722e-05
Fstl4	0.413617	0.00133027	-0.186958	0.204772
Tmcc1	0.361955	0.000823256	-0.236193	0.00440723
Bbs9	0.642881	4.91667e-15	0.0451316	1
Itga9	0.467245	7.12352e-11	-0.128118	1
Otud7a	0.492689	0.000633135	-0.0876169	1
Tubb4b-ps1	-0.344784	1.65233e-07	0.22198	1
Gm26745	0.359193	0.00316468	-0.206256	0.159054
Spata17	0.431974	0.000974637	-0.132543	1
Ptprm	0.454268	0.000228678	-0.108331	0.0431445
Astn2	0.341787	0.00552479	-0.21685	1
Itga11	0.460044	0.00151029	-0.0864192	1
Ftl1	-0.475889	6.58422e-13	0.0536762	1
Arsj	0.401653	0.000253714	-0.122561	1
Nrg3	0.356584	0.00133592	-0.166855	0.0284399
9330101J02Rik	0.46807	0.00491489	-0.0372135	1
Impact	-0.535033	1.86552e-10	-0.0297911	1
Atf3	-0.171428	0.0386147	0.332207	1
Tpr	-0.320569	0.00679321	0.180112	1
Tuba1c	-0.265109	0.00210732	0.232629	1
Hspa8	-0.482343	1.40268e-10	0.0142343	1
Lrrfip1	0.320999	0.00357154	-0.174845	1
Pask	-0.310761	6.22168e-05	0.180224	1
Kcnq1	0.308546	0.0035505	-0.178952	1
Rab39	0.283451	0.0310126	-0.201259	0.0321305
Spag16	0.309341	0.0420469	-0.157677	1
Atrx	-0.269763	0.00925436	0.183826	1
Lrrc58	-0.317209	1.41912e-05	0.130945	1
Gm6133	-0.343315	0.000207627	0.0867695	1
Adamts6	0.306688	0.043508	-0.118404	1
Ppia	-0.473991	6.05476e-13	-0.0490298	1
Rpl10	-0.281716	0.00943004	0.13138	1
Hist1h2bl	-0.3772	0.0119352	0.0349382	1
Gm20594	-0.258458	0.00087987	0.150615	1
Cys1	0.332095	0.0211109	-0.0735706	1
Ncl	-0.227004	0.00795037	0.165885	1
Rps6	-0.362931	0.000380079	0.0262907	1
Gapdh	-0.347713	0.0431553	0.0402629	1
Rab24	-0.315504	4.18125e-05	0.0440788	1
C330021F23Rik	-0.227108	0.0245143	0.126626	1
Jun	-0.313575	3.59368e-05	0.0388817	1
Hsp90ab1	-0.183193	0.011264	0.165749	1
Chd4	-0.281027	0.00130907	0.056754	1
Ier2	-0.435794	9.10236e-06	-0.111272	1
Ubc	-0.259236	0.0191821	0.0611992	1
Hspa2	-0.232535	0.019592	0.0823746	1
Fos	-0.292152	1.0434e-06	0.021446	1
Srebf1	-0.317646	0.0109501	-0.0110142	1
Egr1	-0.244495	0.00783935	0.0590574	1
Rdx	-0.206668	0.00411529	0.0879631	1
Dek	-0.193688	0.00812556	0.0966665	1
Ndufb3	-0.227319	0.00600037	0.0541604	1
Gm10116	-0.333151	0.000350751	-0.0604033	1
Golgb1	-0.290274	0.00091002	-0.0362492	1
Nars	-0.302952	0.0101211	-0.0536313	1
Gadd45g	-0.382238	0.0416884	-0.16164	1
Sh3bgrl3	-0.309224	0.00120769	-0.090239	1
Cd9	-0.192109	0.0333313	0.0266989	1
Zfp36	-0.396546	0.000711795	-0.19193	1
Hist1h2bj	-0.229867	0.00172627	-0.0254587	1
Jund	-0.287171	1.1379e-05	-0.0829518	1
Bclaf1	-0.208392	0.00834142	-0.0191007	1
Zc3h15	-0.200675	0.042332	-0.0256145	1
Col4a3	-0.225877	0.00929433	-0.0592082	1
Gm9493	-0.295302	0.00122451	-0.15211	1
Btg2	-0.281055	2.73506e-05	-0.156377	1
Junb	-0.335452	0.000930747	-0.217283	1
Rpl29	-0.276565	2.61176e-06	-0.173551	0.0256763
Prdx6	-0.317251	0.000888722	-0.236687	1
mt-Co1	-0.234732	9.87696e-05	-0.166463	1
Hmgn3	-0.225255	0.000509169	-0.227748	1
Sfrs18	-0.223749	0.00401169	-0.221925	1
Nr1d1	-0.326192	0.000184262	NA	NA
Pnn	-0.275877	0.00323982	NA	NA
Prrc2c	-0.206963	0.00900405	NA	NA
H2-D1	-0.303384	0.0231764	NA	NA
