# Supplementary material for: Estrogen receptor alpha in the brain mediates tamoxifen-induced changes in physiology in mice
Source: eLife. 2021 Mar 1;10:e63333. doi: 10.7554/eLife.63333 (PMC7924955; doi:10.7554/eLife.63333)
Supplement: Supplementary file 2. — (a) Statistical details for Figure 1, panels c, e, and g. (b) Statistical details for Figure 1—figure supplement 1, panels b and c. (c) Statistical details for Figure 2, panels b and c. (d) Statistical details for Figure 2, panels e-g. (e) Statistical details for Figure 6, panels b-h. (f) Statistical details for Figure 6, panels j and k .(g) Statistical details for Figure 5—figure supplement 1, panel e. [file elife-63333-supp2.xlsx]

## Sheet: File 2a- stats for Fig 1 c,e,g
Supplementary File 2a. Statistical details for Figure 1, panels c, e, and g
Table Analyzed	Tcore_D&N								Table Analyzed	HLI_D&N_mean								Table Analyzed	T_BAT
Two-way RM ANOVA	Matching: Stacked								Two-way RM ANOVA	Matching: Stacked								Column C	WT_Tax
Assume sphericity?	Yes								Assume sphericity?	No								vs.	vs.
Alpha	0.05								Alpha	0.05								Column A	WT_Veh
Source of Variation	% of total variation	P value	P value summary	Significant?					Source of Variation	% of total variation	P value	P value summary	Significant?	Geisser-Greenhouse's epsilon				Unpaired t test
Time x Treatment	1.421	0.0049	**	Yes					Time x Treatment	0.005955	0.9902	ns	No					P value	0.0116
Time	56.72	<0.0001	****	Yes					Time	44.71	<0.0001	****	Yes	0.5001				P value summary	*
Treatment	17.83	0.0039	**	Yes					Treatment	24.59	0.0015	**	Yes					Significantly different (P < 0.05)?	Yes
Subject	20.94	<0.0001	****	Yes					Subject	22.19	0.0001	***	Yes					One- or two-tailed P value?	Two-tailed
																		t, df	t=3.255, df=8
ANOVA table	SS	DF	MS	F (DFn, DFd)	P value				ANOVA table	SS	DF	MS	F (DFn, DFd)	P value
Time x Treatment	0.1121	2	0.05606	F (2, 28) = 6.460	P=0.0049				Time x Treatment	2.597e-05	2	1.298e-05	F (2, 28) = 0.009816	P=0.9902				How big is the difference?
Time	4.475	2	2.237	F (2, 28) = 257.8	P<0.0001				Time	0.195	2	0.09749	F (1.000, 14.00) = 73.70	P<0.0001				Mean of column A	34.56
Treatment	1.407	1	1.407	F (1, 14) = 11.92	P=0.0039				Treatment	0.1072	1	0.1072	F (1, 14) = 15.52	P=0.0015				Mean of column C	33.35
Subject	1.652	14	0.118	F (14, 28) = 13.60	P<0.0001				Subject	0.09676	14	0.006912	F (14, 28) = 5.225	P=0.0001				Difference between means (C - A) ± SEM	-1.210 ± 0.3716
Residual	0.243	28	0.008677						Residual	0.03704	28	0.001323						95% confidence interval	-2.067 to -0.3527
																		R squared (eta squared)	0.5698
Difference between column means									Difference between column means
Mean of WT_Veh	37.25								Mean of WT_Veh	0.4227								F test to compare variances
Mean of WT_Tax	36.91								Mean of WT_Tax	0.5173								F, DFn, Dfd	1.151, 4, 4
Difference between means	0.3424								Difference between means	-0.09453								P value	0.895
SE of difference	0.09917								SE of difference	0.024								P value summary	ns
95% CI of difference	0.1297 to 0.5551								95% CI of difference	-0.1460 to -0.04306								Significantly different (P < 0.05)?	No
Data summary									Data summary									Data analyzed
Number of columns (Treatment)	2								Number of columns (Treatment)	2								Sample size, column A	5
Number of rows (Time)	3								Number of rows (Time)	3								Sample size, column C	5
Number of subjects (Subject)	16								Number of subjects (Subject)	16
Number of missing values	0								Number of missing values	0
Compare each cell mean with the other cell mean in that row									Compare each cell mean with the other cell mean in that row
Number of families	1								Number of families	1
Number of comparisons per family	3								Number of comparisons per family	3
Alpha	0.05								Alpha	0.05
Sidak's multiple comparisons test	Mean Diff.	95.00% CI of diff.	Significant?	Summary	Adjusted P Value				Sidak's multiple comparisons test	Mean Diff.	95.00% CI of diff.	Significant?	Summary	Adjusted P Value
WT_Veh - WT_Tax									WT_Veh - WT_Tax
Light	0.4614	0.1973 to 0.7255	Yes	***	0.0003				Light	-0.0965	-0.1665 to -0.02653	Yes	**	0.0088
Dark	0.2246	-0.03948 to 0.4887	No	ns	0.1164				Dark	-0.09296	-0.1897 to 0.003806	No	ns	0.061
24h	0.3411	0.07702 to 0.6052	Yes	**	0.0076				24h	-0.09414	-0.1597 to -0.02862	Yes	**	0.005
Test details	Mean 1	Mean 2	Mean Diff.	SE of diff.	N1	N2	t	DF	Test details	Mean 1	Mean 2	Mean Diff.	SE of diff.	N1	N2	t	DF
WT_Veh - WT_Tax									WT_Veh - WT_Tax
Light	36.94	36.48	0.4614	0.1062	8	8	4.344	42	Light	0.5003	0.5968	-0.0965	0.02403	8	8	4.016	9.161
Dark	37.57	37.34	0.2246	0.1062	8	8	2.115	42	Dark	0.3459	0.4389	-0.09296	0.0351	8	8	2.648	12.38
24h	37.25	36.91	0.3411	0.1062	8	8	3.212	42	24h	0.422	0.5161	-0.09414	0.02408	8	8	3.91	13.56

## Sheet: File 2b- stats for Fig1 Sup1b,c
Supplementary File 2b. Statistical details for Figure 1 - Figure Supplement 1, panels b and c
Table Analyzed	Tail_D&N_mean								Table Analyzed	Ucp1			Table Analyzed	Adrb3
Two-way RM ANOVA	Matching: Stacked								Column C	WT_Tax			Column C	WT_Tax
Assume sphericity?	No								vs.	vs.			vs.	vs.
Alpha	0.05								Column A	WT_Veh			Column A	WT_Veh
Source of Variation	% of total variation	P value	P value summary	Significant?	Geisser-Greenhouse's epsilon				Unpaired t test				Unpaired t test
Time x Treatment	0.06344	0.9223	ns	No					P value	0.0146			P value	0.0148
Time	45.75	<0.0001	****	Yes	0.5006				P value summary	*			P value summary	*
Treatment	20.71	0.003	**	Yes					Significantly different (P < 0.05)?	Yes			Significantly different (P < 0.05)?	Yes
Subject	22.53	0.0007	***	Yes					One- or two-tailed P value?	Two-tailed			One- or two-tailed P value?	Two-tailed
									t, df	t=2.738, df=16			t, df	t=2.732, df=16
ANOVA table	SS	DF	MS	F (DFn, DFd)	P value
Time x Treatment	0.04728	2	0.02364	F (2, 28) = 0.08109	P=0.9223				How big is the difference?				How big is the difference?
Time	34.09	2	17.05	F (1.001, 14.02) = 58.48	P<0.0001				Mean of column A	1.02			Mean of column A	1.028
Treatment	15.44	1	15.44	F (1, 14) = 12.87	P=0.0030				Mean of column C	0.8266			Mean of column C	0.8056
Subject	16.79	14	1.199	F (14, 28) = 4.113	P=0.0007				Difference between means (C - A) ± SEM	-0.1930 ± 0.07049			Difference between means (C - A) ± SEM	-0.2220 ± 0.08125
Residual	8.162	28	0.2915						95% confidence interval	-0.3425 to -0.04360			95% confidence interval	-0.3943 to -0.04976
									R squared (eta squared)	0.3191			R squared (eta squared)	0.3182
Difference between column means
Mean of WT_Veh	28.82								F test to compare variances				F test to compare variances
Mean of WT_Tax	29.95								F, DFn, Dfd	1.185, 9, 7			F, DFn, Dfd	1.706, 9, 7
Difference between means	-1.134								P value	0.8413			P value	0.4939
SE of difference	0.3161								P value summary	ns			P value summary	ns
95% CI of difference	-1.812 to -0.4562								Significantly different (P < 0.05)?	No			Significantly different (P < 0.05)?	No
Data summary									Data analyzed				Data analyzed
Number of columns (Treatment)	2								Sample size, column A	8			Sample size, column A	8
Number of rows (Time)	3								Sample size, column C	10			Sample size, column C	10
Number of subjects (Subject)	16
Number of missing values	0
Compare each cell mean with the other cell mean in that row
Number of families	1
Number of comparisons per family	3
Alpha	0.05
Sidak's multiple comparisons test	Mean Diff.	95.00% CI of diff.	Significant?	Summary	Adjusted P Value
WT_Veh - WT_Tax
Light	-1.058	-1.965 to -0.1498	Yes	*	0.0231
Dark	-1.211	-2.611 to 0.1886	No	ns	0.0968
24h	-1.134	-1.988 to -0.2798	Yes	**	0.0088
Test details	Mean 1	Mean 2	Mean Diff.	SE of diff.	N1	N2	t	DF
WT_Veh - WT_Tax
Light	29.89	30.94	-1.058	0.3119	8	8	3.39	9.183
Dark	27.75	28.96	-1.211	0.499	8	8	2.427	11.12
24h	28.82	29.95	-1.134	0.3149	8	8	3.6	13.91
t	DF
0.7023	8
11.94	8

## Sheet: File 2c- stats for Fig 2 b,c
Supplementary File 2c. Statistical details for Figure 2, panels b and c
Table Analyzed	Tb.BV/TV		Table Analyzed	Tb.N		Table Analyzed	Tb.Th		Table Analyzed	Tb.Sp		Table Analyzed	Ct.BV/TV		Table Analyzed	Ct.Th		Table Analyzed	Ct.BMD		Table Analyzed	Ct.Ar
Column C	WT_Tax		Column C	WT_Tax		Column C	WT_Tax		Column C	WT_Tax		Column C	WT_Tax		Column C	WT_Tax		Column C	WT_Tax		Column C	WT_Tax
vs.	vs.		vs.	vs.		vs.	vs.		vs.	vs.		vs.	vs.		vs.	vs.		vs.	vs.		vs.	vs.
Column A	WT_Veh		Column A	WT_Veh		Column A	WT_Veh		Column A	WT_Veh		Column A	WT_Veh		Column A	WT_Veh		Column A	WT_Veh		Column A	WT_Veh
Unpaired t test			Unpaired t test			Unpaired t test			Unpaired t test			Unpaired t test			Unpaired t test			Unpaired t test			Unpaired t test
P value	<0.0001		P value	<0.0001		P value	0.0003		P value	<0.0001		P value	0.0052		P value	0.0342		P value	0.928		P value	0.2013
P value summary	****		P value summary	****		P value summary	***		P value summary	****		P value summary	**		P value summary	*		P value summary	ns		P value summary	ns
Significantly different (P < 0.05)?	Yes		Significantly different (P < 0.05)?	Yes		Significantly different (P < 0.05)?	Yes		Significantly different (P < 0.05)?	Yes		Significantly different (P < 0.05)?	Yes		Significantly different (P < 0.05)?	Yes		Significantly different (P < 0.05)?	No		Significantly different (P < 0.05)?	No
One- or two-tailed P value?	Two-tailed		One- or two-tailed P value?	Two-tailed		One- or two-tailed P value?	Two-tailed		One- or two-tailed P value?	Two-tailed		One- or two-tailed P value?	Two-tailed		One- or two-tailed P value?	Two-tailed		One- or two-tailed P value?	Two-tailed		One- or two-tailed P value?	Two-tailed
t, df	t=7.322, df=10		t, df	t=7.539, df=10		t, df	t=5.303, df=10		t, df	t=7.331, df=10		t, df	t=3.557, df=10		t, df	t=2.451, df=10		t, df	t=0.09262, df=10		t, df	t=1.368, df=10
How big is the difference?			How big is the difference?			How big is the difference?			How big is the difference?			How big is the difference?			How big is the difference?			How big is the difference?			How big is the difference?
Mean of column A	0.1025		Mean of column A	4.618		Mean of column A	0.03953		Mean of column A	0.2168		Mean of column A	0.5143		Mean of column A	0.206		Mean of column A	1314		Mean of column A	0.7655
Mean of column C	0.2857		Mean of column C	6.47		Mean of column C	0.05208		Mean of column C	0.1456		Mean of column C	0.5981		Mean of column C	0.2478		Mean of column C	1320		Mean of column C	0.8785
Difference between means (C - A) ± SEM	0.1832 ± 0.02502		Difference between means (C - A) ± SEM	1.853 ± 0.2458		Difference between means (C - A) ± SEM	0.01255 ± 0.002367		Difference between means (C - A) ± SEM	-0.07123 ± 0.009717		Difference between means (C - A) ± SEM	0.08372 ± 0.02353		Difference between means (C - A) ± SEM	0.04183 ± 0.01707		Difference between means (C - A) ± SEM	6.344 ± 68.50		Difference between means (C - A) ± SEM	0.1130 ± 0.08260
95% confidence interval	0.1274 to 0.2389		95% confidence interval	1.305 to 2.400		95% confidence interval	0.007277 to 0.01782		95% confidence interval	-0.09288 to -0.04958		95% confidence interval	0.03128 to 0.1362		95% confidence interval	0.003809 to 0.07986		95% confidence interval	-146.3 to 159.0		95% confidence interval	-0.07105 to 0.2970
R squared (eta squared)	0.8428		R squared (eta squared)	0.8504		R squared (eta squared)	0.7377		R squared (eta squared)	0.8431		R squared (eta squared)	0.5586		R squared (eta squared)	0.3754		R squared (eta squared)	0.0008571		R squared (eta squared)	0.1576
F test to compare variances			F test to compare variances			F test to compare variances			F test to compare variances			F test to compare variances			F test to compare variances			F test to compare variances			F test to compare variances
F, DFn, Dfd	3.008, 5, 5		F, DFn, Dfd	1.533, 5, 5		F, DFn, Dfd	3.145, 5, 5		F, DFn, Dfd	2.573, 5, 5		F, DFn, Dfd	3.825, 5, 5		F, DFn, Dfd	6.269, 5, 5		F, DFn, Dfd	1.122, 5, 5		F, DFn, Dfd	11.11, 5, 5
P value	0.252		P value	0.6508		P value	0.2342		P value	0.3229		P value	0.1672		P value	0.0653		P value	0.9022		P value	0.0195
P value summary	ns		P value summary	ns		P value summary	ns		P value summary	ns		P value summary	ns		P value summary	ns		P value summary	ns		P value summary	*
Significantly different (P < 0.05)?	No		Significantly different (P < 0.05)?	No		Significantly different (P < 0.05)?	No		Significantly different (P < 0.05)?	No		Significantly different (P < 0.05)?	No		Significantly different (P < 0.05)?	No		Significantly different (P < 0.05)?	No		Significantly different (P < 0.05)?	Yes
Data analyzed			Data analyzed			Data analyzed			Data analyzed			Data analyzed			Data analyzed			Data analyzed			Data analyzed
Sample size, column A	6		Sample size, column A	6		Sample size, column A	6		Sample size, column A	6		Sample size, column A	6		Sample size, column A	6		Sample size, column A	6		Sample size, column A	6
Sample size, column C	6		Sample size, column C	6		Sample size, column C	6		Sample size, column C	6		Sample size, column C	6		Sample size, column C	6		Sample size, column C	6		Sample size, column C	6

## Sheet: File 2d- stats for Fig 2 e-g
Supplementary File 2d. Statistical details for Figure 2, panels e-g
Table Analyzed	Activity_D&N								Table Analyzed	BW								Table Analyzed	BW_column
Two-way RM ANOVA	Matching: Stacked								Mixed-effects model (REML)	Matching: Both factors								Column C	WT_Tax
Assume sphericity?	Yes								Assume sphericity?	No								vs.	vs.
Alpha	0.05								Alpha	0.05								Column A	WT_Veh
Source of Variation	% of total variation	P value	P value summary	Significant?					Fixed effects (type III)	P value	P value summary	Statistically significant (P < 0.05)?	F (DFn, DFd)	Geisser-Greenhouse's epsilon				Unpaired t test
Time x Treatment	0.6347	0.0616	ns	No					time	0.0001	***	Yes	F (0.7233, 7.233) = 62.13	0.06575				P value	0.801
Time	81.48	<0.0001	****	Yes					Treatment	0.5468	ns	No	F (1.000, 10.00) = 0.3891	1				P value summary	ns
Treatment	4.597	0.0262	*	Yes					time x Treatment	0.6277	ns	No	F (1.890, 11.34) = 0.4674	0.1718				Significantly different (P < 0.05)?	No
Subject	10.41	<0.0001	****	Yes														One- or two-tailed P value?	Two-tailed
									Random effects	SD	Variance							t, df	t=0.2572, df=13
ANOVA table	SS	DF	MS	F (DFn, DFd)	P value				Subject	0.5194	0.2698
Time x Treatment	10.01	2	5.007	F (2, 28) = 3.083	P=0.0616				Subject x time	0	0							How big is the difference?
Time	1285	2	642.7	F (2, 28) = 395.8	P<0.0001				Subject x Treatment	1.72	2.957							Mean of column A	2.886
Treatment	72.52	1	72.52	F (1, 14) = 6.182	P=0.0262				Residual	0.5102	0.2603							Mean of column C	3.05
Subject	164.2	14	11.73	F (14, 28) = 7.224	P<0.0001													Difference between means (C - A) ± SEM	0.1643 ± 0.6387
Residual	45.47	28	1.624						Was the matching effective?									95% confidence interval	-1.216 to 1.544
									Chi-square, df	420.4, 2								R squared (eta squared)	0.005064
Difference between column means									P value	<0.0001
Mean of WT_Veh	13.64								P value summary	****								F test to compare variances
Mean of WT_Tax	11.19								Is there significant matching (P < 0.05)?	Yes								F, DFn, Dfd	2.174, 7, 6
Difference between means	2.458																	P value	0.3631
SE of difference	0.9888								Difference between column means									P value summary	ns
95% CI of difference	0.3377 to 4.579								Predicted mean of WT_Veh	23.55								Significantly different (P < 0.05)?	No
									Predicted mean of WT_Tax	23.06
Data summary									Difference between predicted means	0.4862								Data analyzed
Number of columns (Treatment)	2								SE of difference	0.7795								Sample size, column A	7
Number of rows (Time)	3								95% CI of difference	-1.251 to 2.223								Sample size, column C	8
Number of subjects (Subject)	16
Number of missing values	0								Data summary
									Number of columns (Treatment)	2
									Number of rows (time)	12
Compare each cell mean with the other cell mean in that row									Number of subjects (Subject)	11
									Number of missing values	44
Number of families	1
Number of comparisons per family	3
Alpha	0.05								Compare each cell mean with the other cell mean in that row
Sidak's multiple comparisons test	Mean Diff.	95.00% CI of diff.	Significant?	Summary	Adjusted P Value				Number of families	1
									Number of comparisons per family	12
WT_Veh - WT_Tax									Alpha	0.05
Light	1.489	-1.290 to 4.267	No	ns	0.4683
Dark	2.204	-0.5746 to 4.982	No	ns	0.1565				Sidak's multiple comparisons test	Mean Diff.	95.00% CI of diff.	Significant?	Summary	Adjusted P Value
24h	3.683	0.9041 to 6.461	Yes	**	0.006
									WT_Veh - WT_Tax
									-1	0.5788	-2.649 to 3.807	No	ns	0.9998
Test details	Mean 1	Mean 2	Mean Diff.	SE of diff.	N1	N2	t	DF	0	0.4667	-2.566 to 3.499	No	ns	>0.9999
									3	0.3949	-3.172 to 3.962	No	ns	>0.9999
WT_Veh - WT_Tax									6	0.3475	-2.791 to 3.486	No	ns	>0.9999
Light	6.695	5.206	1.489	1.117	8	8	1.332	42	9	0.402	-2.414 to 3.218	No	ns	>0.9999
Dark	13.78	11.57	2.204	1.117	8	8	1.972	42	12	0.3798	-2.550 to 3.310	No	ns	>0.9999
24h	20.46	16.78	3.683	1.117	8	8	3.296	42	15	0.5798	-2.628 to 3.788	No	ns	0.9997
									18	1.356	-1.798 to 4.509	No	ns	0.7301
t	DF								21	1.471	-1.670 to 4.612	No	ns	0.6393
									24	1.079	-2.329 to 4.487	No	ns	0.9383
									27	0.8984	-3.094 to 4.890	No	ns	0.9947
1.696	7								29	0.9651	-3.591 to 5.521	No	ns	0.9968
4.201	7
5.823	7
7.422	7								Test details	Mean 1	Mean 2	Mean Diff.	SE of diff.	N1	N2	t	DF
14.63	7
16.8	7								WT_Veh - WT_Tax
									-1	22.18	21.6	0.5788	0.8183	9	11	0.7073	8
									0	22.27	21.8	0.4667	0.7686	9	11	0.6072	8
									3	22.52	22.13	0.3949	0.9041	9	11	0.4368	8
									6	22.71	22.36	0.3475	0.7955	9	11	0.4368	8
									9	23.21	22.81	0.402	0.7139	9	11	0.5632	8
									12	23.29	22.91	0.3798	0.7427	9	11	0.5113	8
									15	23.69	23.11	0.5798	0.8132	9	11	0.713	8
									18	24.4	23.04	1.356	0.7064	7	9	1.919	6
									21	24.87	23.4	1.471	0.7036	7	9	2.091	6
									24	24.86	23.78	1.079	0.7634	7	9	1.414	6
									27	24.94	24.04	0.8984	0.8943	7	9	1.005	6
									29	25.44	24.48	0.9651	1.021	7	9	0.9456	6

## Sheet: File 2e- stats for Fig 6 b-h
Supplementary File 2e. Statistical details for Figure 6, panels b-h
Table Analyzed	Temp_c_D&N								Table Analyzed	HLI_D&N_mean								Table Analyzed	T_BAT		Table Analyzed	Activity_D&N
Two-way RM ANOVA	Matching: Stacked								Two-way RM ANOVA	Matching: Stacked								Column D	KO_Tax		Two-way RM ANOVA	Matching: Stacked
Assume sphericity?	No								Assume sphericity?	No								vs.	vs.		Assume sphericity?	No
Alpha	0.05								Alpha	0.05								Column B	KO_Veh		Alpha	0.05
Source of Variation	% of total variation	P value	P value summary	Significant?	Geisser-Greenhouse's epsilon				Source of Variation	% of total variation	P value	P value summary	Significant?	Geisser-Greenhouse's epsilon				Unpaired t test			Source of Variation	% of total variation	P value	P value summary	Significant?	Geisser-Greenhouse's epsilon
Time x Group	3.77	0.0077	**	Yes					Time x Treatment	0.6557	0.3534	ns	No					P value	0.8048		Time x Treatment	0.704	0.0387	*	Yes
Time	15.34	<0.0001	****	Yes	0.6592				Time	47.59	<0.0001	****	Yes	0.5001				P value summary	ns		Time	87.05	<0.0001	****	Yes	0.6963
Group	0.7083	0.7144	ns	No					Treatment	8.284	0.1013	ns	No					Significantly different (P < 0.05)?	No		Treatment	1.514	0.1266	ns	No
Subject	71.1	<0.0001	****	Yes					Subject	34.63	<0.0001	****	Yes					One- or two-tailed P value?	Two-tailed		Subject	8.036	<0.0001	****	Yes
																		t, df	t=0.2640, df=4
ANOVA table	SS	DF	MS	F (DFn, DFd)	P value				ANOVA table	SS	DF	MS	F (DFn, DFd)	P value							ANOVA table	SS	DF	MS	F (DFn, DFd)	P value
Time x Group	0.2143	2	0.1071	F (2, 28) = 5.813	P=0.0077				Time x Treatment	0.004494	2	0.002247	F (2, 26) = 1.083	P=0.3534				How big is the difference?			Time x Treatment	14.15	2	7.074	F (2, 28) = 3.662	P=0.0387
Time	0.872	2	0.436	F (1.318, 18.46) = 23.66	P<0.0001				Time	0.3262	2	0.1631	F (1.000, 13.00) = 78.61	P<0.0001				Mean of column B	33.76		Time	1749	2	874.7	F (1.393, 19.50) = 452.8	P<0.0001
Group	0.04025	1	0.04025	F (1, 14) = 0.1395	P=0.7144				Treatment	0.05678	1	0.05678	F (1, 13) = 3.109	P=0.1013				Mean of column D	33.67		Treatment	30.43	1	30.43	F (1, 14) = 2.638	P=0.1266
Subject	4.04	14	0.2886	F (14, 28) = 15.66	P<0.0001				Subject	0.2374	13	0.01826	F (13, 26) = 8.800	P<0.0001				Difference between means (D - B) ± SEM	-0.09652 ± 0.3657		Subject	161.5	14	11.53	F (14, 28) = 5.972	P<0.0001
Residual	0.516	28	0.01843						Residual	0.05395	26	0.002075						95% confidence interval	-1.112 to 0.9187		Residual	54.09	28	1.932
																		R squared (eta squared)	0.01712
Difference between column means									Difference between column means												Difference between column means
Mean of KO_Veh	37.33								Mean of KO_Veh	0.5644								F test to compare variances			Mean of KO_Veh	13.4
Mean of KO_Tax	37.39								Mean of KO_Tax	0.4932								F, DFn, Dfd	4.519, 2, 2		Mean of KO_Tax	15
Difference between means	-0.05792								Difference between means	0.0712								P value	0.3624		Difference between means	-1.593
SE of difference	0.1551								SE of difference	0.04038								P value summary	ns		SE of difference	0.9804
95% CI of difference	-0.3905 to 0.2747								95% CI of difference	-0.01603 to 0.1584								Significantly different (P < 0.05)?	No		95% CI of difference	-3.695 to 0.5103
Data summary									Data summary									Data analyzed			Data summary
Number of columns (Group)	2								Number of columns (Treatment)	2								Sample size, column B	3		Number of columns (Treatment)	2
Number of rows (Time)	3								Number of rows (Time)	3								Sample size, column D	3		Number of rows (Time)	3
Number of subjects (Subject)	16								Number of subjects (Subject)	15											Number of subjects (Subject)	16
Number of missing values	0								Number of missing values	0											Number of missing values	0
Compare each cell mean with the other cell mean in that row									Compare each cell mean with the other cell mean in that row												Compare each cell mean with the other cell mean in that row
Number of families	1								Number of families	1											Number of families	1
Number of comparisons per family	3								Number of comparisons per family	3											Number of comparisons per family	3
Alpha	0.05								Alpha	0.05											Alpha	0.05
Sidak's multiple comparisons test	Mean Diff.	95.00% CI of diff.	Significant?	Summary	Adjusted P Value				Sidak's multiple comparisons test	Mean Diff.	95.00% CI of diff.	Significant?	Summary	Adjusted P Value							Sidak's multiple comparisons test	Mean Diff.	95.00% CI of diff.	Significant?	Summary	Adjusted P Value
KO_Veh - KO_Tax									KO_Veh - KO_Tax												KO_Veh - KO_Tax
Light	0.08	-0.3968 to 0.5568	No	ns	0.9594				Light	0.0465	-0.03446 to 0.1275	No	ns	0.3631							Light	-0.0575	-1.679 to 1.564	No	ns	0.9995
Dark	-0.2388	-0.6605 to 0.1830	No	ns	0.3766				Dark	0.09557	-0.07274 to 0.2639	No	ns	0.363							Dark	-2.325	-5.537 to 0.8868	No	ns	0.1912
24h	-0.015	-0.4576 to 0.4276	No	ns	0.9996				24h	0.07152	-0.04432 to 0.1874	No	ns	0.2973							24h	-2.395	-6.687 to 1.897	No	ns	0.3593
Test details	Mean 1	Mean 2	Mean Diff.	SE of diff.	N1	N2	t	DF	Test details	Mean 1	Mean 2	Mean Diff.	SE of diff.	N1	N2	t	DF				Test details	Mean 1	Mean 2	Mean Diff.	SE of diff.	N1	N2	t	DF
KO_Veh - KO_Tax									KO_Veh - KO_Tax												KO_Veh - KO_Tax
Light	37.25	37.17	0.08	0.176	8	8	0.4547	13.98	Light	0.657	0.6105	0.0465	0.02954	7	8	1.575	12.86				Light	6.518	6.575	-0.0575	0.572	8	8	0.1005	10.49
Dark	37.41	37.65	-0.2388	0.1544	8	8	1.546	13.2	Dark	0.4726	0.377	0.09557	0.06011	7	8	1.59	11.24				Dark	13.59	15.92	-2.325	1.163	8	8	1.999	12.26
24h	37.33	37.35	-0.015	0.1629	8	8	0.09206	13.74	24h	0.5637	0.4922	0.07152	0.04132	7	8	1.731	11.15				24h	20.11	22.5	-2.395	1.473	8	8	1.626	9.125

## Sheet: File 2f- stats for Fig 6 j,k
Supplementary File 2f. Statistical details for Figure 6, panels j and k
Table Analyzed	Tb.BV/TV		Table Analyzed	Tb.N		Table Analyzed	Tb.Th		Table Analyzed	Tb.Sp		Table Analyzed	Ct.BV/TV		Table Analyzed	Ct.Th
Column D	KO_Tax		Column D	KO_Tax		Column D	KO_Tax		Column D	KO_Tax		Column D	KO_Tax		Column D	KO_Tax
vs.	vs.		vs.	vs.		vs.	vs.		vs.	vs.		vs.	vs.		vs.	vs.
Column B	KO_Veh		Column B	KO_Veh		Column B	KO_Veh		Column B	KO_Veh		Column B	KO_Veh		Column B	KO_Veh
Unpaired t test			Unpaired t test			Unpaired t test			Unpaired t test			Unpaired t test			Unpaired t test
P value	0.4237		P value	0.0074		P value	0.7951		P value	0.0832		P value	0.5643		P value	0.354
P value summary	ns		P value summary	**		P value summary	ns		P value summary	ns		P value summary	ns		P value summary	ns
Significantly different (P < 0.05)?	No		Significantly different (P < 0.05)?	Yes		Significantly different (P < 0.05)?	No		Significantly different (P < 0.05)?	No		Significantly different (P < 0.05)?	No		Significantly different (P < 0.05)?	No
One- or two-tailed P value?	Two-tailed		One- or two-tailed P value?	Two-tailed		One- or two-tailed P value?	Two-tailed		One- or two-tailed P value?	Two-tailed		One- or two-tailed P value?	Two-tailed		One- or two-tailed P value?	Two-tailed
t, df	t=0.8340, df=10		t, df	t=3.349, df=10		t, df	t=0.2668, df=10		t, df	t=1.924, df=10		t, df	t=0.5963, df=10		t, df	t=0.9720, df=10
How big is the difference?			How big is the difference?			How big is the difference?			How big is the difference?			How big is the difference?			How big is the difference?
Mean of column B	0.5758		Mean of column B	11.48		Mean of column B	0.068		Mean of column B	0.07003		Mean of column B	0.7143		Mean of column B	0.2967
Mean of column D	0.4869		Mean of column D	8.659		Mean of column D	0.07092		Mean of column D	0.09762		Mean of column D	0.7309		Mean of column D	0.3157
Difference between means (D - B) ± SEM	-0.08890 ± 0.1066		Difference between means (D - B) ± SEM	-2.826 ± 0.8437		Difference between means (D - B) ± SEM	0.002917 ± 0.01093		Difference between means (D - B) ± SEM	0.02758 ± 0.01434		Difference between means (D - B) ± SEM	0.01658 ± 0.02781		Difference between means (D - B) ± SEM	0.01900 ± 0.01955
95% confidence interval	-0.3264 to 0.1486		95% confidence interval	-4.706 to -0.9461		95% confidence interval	-0.02144 to 0.02728		95% confidence interval	-0.004357 to 0.05952		95% confidence interval	-0.04539 to 0.07855		95% confidence interval	-0.02455 to 0.06255
R squared (eta squared)	0.06504		R squared (eta squared)	0.5287		R squared (eta squared)	0.007067		R squared (eta squared)	0.2702		R squared (eta squared)	0.03433		R squared (eta squared)	0.08632
F test to compare variances			F test to compare variances			F test to compare variances			F test to compare variances			F test to compare variances			F test to compare variances
F, DFn, Dfd	1.285, 5, 5		F, DFn, Dfd	1.405, 5, 5		F, DFn, Dfd	1.899, 5, 5		F, DFn, Dfd	1.985, 5, 5		F, DFn, Dfd	1.836, 5, 5		F, DFn, Dfd	1.011, 5, 5
P value	0.7901		P value	0.7183		P value	0.4986		P value	0.4697		P value	0.521		P value	0.9905
P value summary	ns		P value summary	ns		P value summary	ns		P value summary	ns		P value summary	ns		P value summary	ns
Significantly different (P < 0.05)?	No		Significantly different (P < 0.05)?	No		Significantly different (P < 0.05)?	No		Significantly different (P < 0.05)?	No		Significantly different (P < 0.05)?	No		Significantly different (P < 0.05)?	No
Data analyzed			Data analyzed			Data analyzed			Data analyzed			Data analyzed			Data analyzed
Sample size, column B	6		Sample size, column B	6		Sample size, column B	6		Sample size, column B	6		Sample size, column B	6		Sample size, column B	6
Sample size, column D	6		Sample size, column D	6		Sample size, column D	6		Sample size, column D	6		Sample size, column D	6		Sample size, column D	6
N2	t	DF
46	9.869	72
28	2.627	72

## Sheet: File 2g- stats for Fig 5-Sup1e
Supplementary File 2g. Statistical details for Figure 5 - Figure Supplement 1, panel e
Table Analyzed	Grouped: Three-way ANOVA (2x2x3)						Pairwise comparisons following 2-way ANOVA
							Compare each cell mean with the other cell mean in that row
Three-way ANOVA	Ordinary
Alpha	0.05						Number of families	1
							Number of comparisons per family	9
Source of Variation	% of total variation	P value	P value summary	Significant?			Alpha	0.05
cluster	79.87	<0.0001	****	Yes
genotype	1.356e-17	>0.9999	ns	No			Šídák's multiple comparisons test	Mean Diff.	95.00% CI of diff.	Below threshold?	Summary	Adjusted P Value
treatment	1.356e-17	>0.9999	ns	No
cluster x genotype	4.176	<0.0001	****	Yes			Esr1 cKO - wild-type
cluster x treatment	0.4818	0.8155	ns	No			Astro	-0.07437	-0.1151 to -0.03364	Yes	****	<0.0001
genotype x treatment	1.641e-15	>0.9999	ns	No			Oligo	0.04193	0.001198 to 0.08266	Yes	*	0.0393
cluster x genotype x treatment	1.011	0.3323	ns	No			Neuron	0.008443	-0.03229 to 0.04917	No	ns	0.9994
							Endo	0.01142	-0.02931 to 0.05215	No	ns	0.9938
ANOVA table	SS (Type III)	DF	MS	F (DFn, DFd)	P value		Microglia	0.01173	-0.02900 to 0.05246	No	ns	0.9925
cluster	0.6331	8	0.07914	F (8, 108) = 91.33	P<0.0001		Polydendro	0.01437	-0.02636 to 0.05510	No	ns	0.9701
genotype	1.075e-19	1	1.075e-19	F (1, 108) = 1.241e-016	P>0.9999		Ependymal	-0.01048	-0.05121 to 0.03025	No	ns	0.9967
treatment	1.075e-19	1	1.075e-19	F (1, 108) = 1.241e-016	P>0.9999		Mural	-0.003265	-0.04400 to 0.03747	No	ns	>0.9999
cluster x genotype	0.0331	8	0.004138	F (8, 108) = 4.775	P<0.0001		Fibro	0.0002334	-0.04050 to 0.04097	No	ns	>0.9999
cluster x treatment	0.00382	8	0.0004774	F (8, 108) = 0.5509	P=0.8155
genotype x treatment	1.301e-17	1	1.301e-17	F (1, 108) = 1.501e-014	P>0.9999
cluster x genotype x treatment	0.008017	8	0.001002	F (8, 108) = 1.156	P=0.3323		Test details	Mean 1	Mean 2	Mean Diff.	SE of diff.	N1	N2	t	DF
Residual	0.09359	108	0.0008666
							Esr1 cKO - wild-type
							Astro	0.2033	0.2777	-0.07437	0.01448	8	8	5.138	126
							Oligo	0.1899	0.1479	0.04193	0.01448	8	8	2.896	126
							Neuron	0.1724	0.164	0.008443	0.01448	8	8	0.5832	126
							Endo	0.1312	0.1198	0.01142	0.01448	8	8	0.7887	126
Table Analyzed	3way ANOVA of Grouped: Three-way ANOVA (2x2x3):Consolidated Data across treatment						Microglia	0.1048	0.09303	0.01173	0.01448	8	8	0.8103	126
							Polydendro	0.09079	0.07643	0.01437	0.01448	8	8	0.9925	126
Two-way RM ANOVA	Matching: Stacked						Ependymal	0.0486	0.05909	-0.01048	0.01448	8	8	0.7242	126
Assume sphericity?	Yes						Mural	0.03724	0.04051	-0.003265	0.01448	8	8	0.2256	126
Alpha	0.05						Fibro	0.02178	0.02155	0.0002334	0.01448	8	8	0.01612	126
Source of Variation	% of total variation	P value	P value summary	Significant?
cluster x genotype	4.014	0.0002	***	Yes
cluster	82.66	<0.0001	****	Yes
genotype	8.76e-17	0.7645	ns	No
Subject	1.314e-14	>0.9999	ns	No
ANOVA table	SS	DF	MS	F (DFn, DFd)	P value
cluster x genotype	0.03182	8	0.003978	F (8, 112) = 4.218	P=0.0002
cluster	0.6553	8	0.08191	F (8, 112) = 86.87	P<0.0001
genotype	6.944e-19	1	6.944e-19	F (1, 14) = 0.09333	P=0.7645
Subject	1.042e-16	14	7.44e-18	F (14, 112) = 7.890e-015	P>0.9999
Residual	0.1056	112	0.000943
Difference between column means
Mean of Esr1 cKO	0.1111
Mean of wild-type	0.1111
Difference between means	1.389e-10
SE of difference	4.546e-10
95% CI of difference	-8.362e-010 to 1.114e-009
Data summary
Number of columns (genotype)	2
Number of rows (cluster)	9
Number of subjects (Subject)	16
Number of missing values	0
